# Supplementary material for: Cross-sectional associations between physical activity pattern, sports participation, screen time and mental health in Swedish adolescents
Source: PubMed Central journal article supplement — BMJ Open. 2022 Aug 2;12(8):e061929. doi: 10.1136/bmjopen-2022-061929 (PMC9351317; doi:10.1136/bmjopen-2022-061929), 2022-08-02
Supplement: bmjopen-2022-061929.draft_revisions.pdf [file bmjopen-2022-061929.draft_revisions.pdf]

# BMJ Open

BMJ Open is committed to open peer review. As part of this commitment we make the peer review history of every article we publish publicly available.

When an article is published we post the peer reviewers' comments and the authors' responses online. We also post the versions of the paper that were used during peer review. These are the versions that the peer review comments apply to.

The versions of the paper that follow are the versions that were submitted during the peer review process. They are not the versions of record or the final published versions. They should not be cited or distributed as the published version of this manuscript.

BMJ Open is an open access journal and the full, final, typeset and author-corrected version of record of the manuscript is available on our site with no access controls, subscription charges or pay-per-view fees (<http://bmjopen.bmj.com>).

If you have any questions on BMJ Open's open peer review process please email [info.bmjopen@bmj.com](mailto:info.bmjopen@bmj.com)

# BMJ Open

## Cross-sectional associations between physical activity pattern, sports participation, screen time and mental health in Swedish adolescents

|                               |                                                                                                                                                                                                                                                                                                                                                                                                                                                                                                                                                                                          |
|-------------------------------|------------------------------------------------------------------------------------------------------------------------------------------------------------------------------------------------------------------------------------------------------------------------------------------------------------------------------------------------------------------------------------------------------------------------------------------------------------------------------------------------------------------------------------------------------------------------------------------|
| Journal:                      | <i>BMJ Open</i>                                                                                                                                                                                                                                                                                                                                                                                                                                                                                                                                                                          |
| Manuscript ID                 | bmjopen-2022-061929                                                                                                                                                                                                                                                                                                                                                                                                                                                                                                                                                                      |
| Article Type:                 | Original research                                                                                                                                                                                                                                                                                                                                                                                                                                                                                                                                                                        |
| Date Submitted by the Author: | 10-Feb-2022                                                                                                                                                                                                                                                                                                                                                                                                                                                                                                                                                                              |
| Complete List of Authors:     | Kjellenberg, Karin; Swedish School of Sport and Health Sciences GIH, Physical Activity and Health<br>Ekblom, Orjan; Gymnastik och Idrottshogskolan<br>Åhlén, Johan; Karolinska Institutet, Department of Public Health Sciences<br>Helgadóttir, Björg; Swedish School of Sport and Health Sciences GIH, Department of Physical Activity and Health; Karolinska Institutet, Department of Clinical Neuroscience<br>Nyberg, Gisela; Swedish School of Sport and Health Sciences GIH, Department of Physical Activity and Health; Karolinska Institutet, Department of Global Public Health |
| Keywords:                     | Child & adolescent psychiatry < PSYCHIATRY, PUBLIC HEALTH, Community child health < PAEDIATRICS                                                                                                                                                                                                                                                                                                                                                                                                                                                                                          |
|                               |                                                                                                                                                                                                                                                                                                                                                                                                                                                                                                                                                                                          |

SCHOLARONE™  
Manuscripts

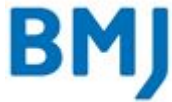

I, the Submitting Author has the right to grant and does grant on behalf of all authors of the Work (as defined in the below author licence), an exclusive licence and/or a non-exclusive licence for contributions from authors who are: i) UK Crown employees; ii) where BMJ has agreed a CC-BY licence shall apply, and/or iii) in accordance with the terms applicable for US Federal Government officers or employees acting as part of their official duties; on a worldwide, perpetual, irrevocable, royalty-free basis to BMJ Publishing Group Ltd ("BMJ") its licensees and where the relevant Journal is co-owned by BMJ to the co-owners of the Journal, to publish the Work in this journal and any other BMJ products and to exploit all rights, as set out in our [licence](#).

The Submitting Author accepts and understands that any supply made under these terms is made by BMJ to the Submitting Author unless you are acting as an employee on behalf of your employer or a postgraduate student of an affiliated institution which is paying any applicable article publishing charge ("APC") for Open Access articles. Where the Submitting Author wishes to make the Work available on an Open Access basis (and intends to pay the relevant APC), the terms of reuse of such Open Access shall be governed by a Creative Commons licence – details of these licences and which [Creative Commons](#) licence will apply to this Work are set out in our licence referred to above.

Other than as permitted in any relevant BMJ Author's Self Archiving Policies, I confirm this Work has not been accepted for publication elsewhere, is not being considered for publication elsewhere and does not duplicate material already published. I confirm all authors consent to publication of this Work and authorise the granting of this licence.

**Manuscript****Title**

Cross-sectional associations between physical activity pattern, sports participation, screen time and mental health in Swedish adolescents

**Authors**

Kjellenberg K<sup>1\*</sup>, Ekblom Ö<sup>1</sup>, Ahlen J<sup>2</sup>, Helgadóttir B<sup>1,3</sup>, and Nyberg G<sup>1,2</sup>,

**Affiliations**

<sup>1</sup>Department of Physical Activity and Health, The Swedish School of Sport and Health Sciences (GIH), Stockholm, Sweden

<sup>2</sup>Department of Global Public Health, Karolinska Institutet, Stockholm, Sweden

<sup>3</sup>Department of Clinical Neuroscience, Karolinska Institutet, Stockholm, Sweden

1. Karin Kjellenberg; MSc, Doctoral student, Department of Physical Activity and Health, The Swedish School of Sport and Health Sciences, Stockholm, Sweden
2. Örjan Ekblom, Ph.D., Professor, Department of Physical Activity and Health, The Swedish School of Sport and Health Sciences, Stockholm, Sweden
3. Johan Ahlén, Ph.D., Department of Global Public Health, Karolinska Institutet, Stockholm, Sweden
4. Björg Helgadóttir, Ph.D., Project Researcher, Department of Physical Activity and Health, The Swedish School of Sport and Health Sciences, Stockholm, Sweden; Department of Clinical Neuroscience Karolinska Institutet, Stockholm, Sweden
5. Gisela Nyberg, Ph.D., Associate Professor, Department of Physical Activity and Health, The Swedish School of Sport and Health Sciences, Stockholm, Sweden; Department of Global Public Health, Karolinska Institutet, Stockholm, Sweden

**\*Corresponding author**

Name Karin Kjellenberg  
Department Physical Activity and Health  
Institution The Swedish School of Sport and Health Sciences (GIH)  
Postal address Box 5626, 114 33 Stockholm, Sweden  
Country Sweden  
Tel + 46 8 120 53 811  
Email [karin.kjellenberg@gih.se](mailto:karin.kjellenberg@gih.se)

**Word count:** 4209

**ABSTRACT**

**Objectives:** To investigate the associations between physical activity pattern, sports participation, screen time, and mental health in Swedish adolescents

**Design:** Cross-sectional study

**Setting:** Students from 34 different schools participated in the study “Physical Activity for Healthy Brain Functions in School Youth” in 2019.

**Participants:** 1139 Swedish adolescents (mean age 13.4)

**Methods:** Time spent sedentary and in moderate-to-vigorous-physical activity was measured using accelerometers (Actigraph) for seven consecutive days. Screen time and participation in organized sports were self-reported. Anxiety and health-related quality of life were assessed using a short version of the Spence Children’s Anxiety Scale (SCAS-S) and Kidscreen-10. All analyzes were stratified by gender.

**Results:** Significant associations were found between physical activity patterns during the whole week and health-related quality of life. The moderate-to-vigorous-physical activity was positively associated whereas time spent sedentary or using screens on weekdays was inversely associated with health-related quality of life. The largest effect sizes were observed between the high/low MVPA group in boys and between the high/low screen time group in girls. With regards to anxiety, high compared to lower time spent in moderate-to-vigorous-physical activity during leisure time on weekdays was associated with lower anxiety scores. Some gender differences were observed, boys who participated in organized sports had low anxiety scores whereas girls who reported five hours or more of screen time had high anxiety scores.

**Conclusions:** This study showed that moderate-to-vigorous physical activity was associated with better mental health, whereas the opposite was seen for time spent sedentary or using screens. However, these associations were not consistently significant throughout all time domains, between the genders and the mental health outcomes. Our results could create a paradigm for future studies to decide which types of PA patterns and time domains to target in intervention studies with the aim improve mental health among adolescents.

**Keywords:** Adolescent, Physical Activity, Sedentary Behavior, Screen time, Accelerometry, Screen time, Mental health, Anxiety, Health-related quality of life, Kidscreen

1  
2  
3  
4  
5 107 **STRENGTHS AND LIMITATIONS OF THIS STUDY**

- 6 108     • Physical activity and sedentary time were assessed using accelerometers  
7 109     • The study included both a positive and negative indicator of mental health  
8 110     • Due to the cross-sectional design causation or the direction of these associations cannot be  
9 111       studies  
10 112  
11 113

12  
13  
14  
15  
16  
17  
18  
19  
20  
21  
22  
23  
24  
25  
26  
27  
28  
29  
30  
31  
32  
33  
34  
35  
36  
37  
38  
39  
40  
41  
42  
43  
44  
45  
46  
47  
48  
49  
50  
51  
52  
53  
54  
55  
56  
57  
58  
59  
60

For peer review only

## 114 INTRODUCTION

115 The World Health Organization describes health as “a state of complete physical, mental and social  
116 well-being and not merely the absence of disease or infirmity”<sup>1</sup>. Thus, mental health is an important  
117 component of health and includes both positive indicators (e.g. well-being) and negative indicators  
118 (e.g. psychiatric symptoms). Poor mental health among youth is a global public health concern with  
119 major consequences for both individuals and society<sup>2</sup>. Mental disorders at an early age have been  
120 associated with stigma, decreased academic achievements, increased risk of physical disorders in  
121 adulthood, and premature death<sup>3</sup>. The age of onset for approximately half of the mental disorders  
122 occurs before or during adolescence<sup>4</sup>, with anxiety being the most common mental disorder with a  
123 prevalence of 6.5%<sup>5</sup>. Therefore, it is important to investigate how modifiable lifestyle factors are  
124 associated with mental health in this population.

125  
126 Physical activity (PA) has been found to be a protective factor for emotional problems<sup>6</sup> and high  
127 levels of PA have cross-sectionally been associated with better mental health outcomes<sup>7-10</sup>. Studies  
128 have also shown a lower prevalence of depressive symptoms in those engaging in organized sports  
129 compared to those being active on their own<sup>11 12</sup>, suggesting that the context of activity could be  
130 important. However, the majority of adolescents do not meet the PA recommendations of 60 minutes  
131 of moderate-to-vigorous-physical activity (MVPA) per day<sup>13</sup>. A study in Swedish adolescents (11-18-  
132 year-olds) found that only 23% of girls and 43% of boys met the recommendations<sup>14</sup>. In addition,  
133 sedentary behaviors, especially screen time have been associated with poor mental health<sup>15 16</sup>.

134  
135 Although these associations have been studied before, most studies rely on self-reported PA<sup>10</sup>, which  
136 has shown to have low validity in this population<sup>17</sup>. A more robust measure is device-measured PA  
137 that provides a more detailed estimate of PA and SED. There is also a lack of studies that include both  
138 positive and negative indicators of mental health, with a tendency to focus on mental health disorders  
139 or symptoms.

140  
141 The objective of the study was therefore to examine cross-sectional associations between device-  
142 measured PA patterns (MVPA, SED), sports participation, screen time, and mental health (anxiety and  
143 health-related quality of life) in Swedish adolescents.

## 144 METHODS

### 145 Sample

146  
147 This study is part of the larger cross-sectional study Physical Activity for Healthy Brain Functions in  
148 School Youth performed between September–December 2019. A sample size of 1000 students was  
149 estimated to provide a representative sample of students from schools with varying sizes, geographic  
150 locations, and parental socio-economic backgrounds. Figure 1 shows an overview of the participating  
151 schools and students. A total of 34 schools participated, the provided reasons for the schools that  
152 declined or dropped out were time constraints. From these schools, 1139 students participated (73%  
153 response rate), 49% boys and 51% girls, the recruitment process is described in more detail elsewhere  
154<sup>18</sup>. The characteristics of the students are shown in Table 1. The study had ethical approval by the  
155 Swedish Ethical Review Authority (DNR: 2019-03579) and was conducted by the Declaration of  
156 Helsinki. All participants and their parents provided written informed consent.

157  
158 The students participated in the measurements at the Swedish School of Sport and Health Sciences,  
159 GIH, and during the visit, they were provided with an accelerometer, which they used for the  
160 following seven days. The students received a 300 SEK (€ 30) gift card as compensation for their  
161 participation.

162  
163 **[Figure 1 should be inserted here]**  
164  
165  
166

## 167 **Patient and Public Involvement**

168 The students were not involved in the design, conduct, reporting, or dissemination plans of our  
169 research however, the participating schools, students, and their parents received a summary of the  
170 results from the study.

## 172 **Measures**

### 173 **Mental health**

174 Health-related quality of life (HRQoL) was assessed using Kidscreen-10. The scale includes 10 items  
175 of how often the students have felt during the last week, for example, 'sad', 'lonely' or 'fit and well'.  
176 The answers range from never/not at all to always/extremely on a five-point scale. The scores are  
177 summed up with higher values indicating greater wellbeing. To compare these values to a reference  
178 population, Rasch person-parameters can be estimated by transforming the data into a T-score with a  
179 mean of 50 and SD of 10 using the provided syntax from the Kidscreen group <sup>19</sup>.

180  
181 Anxiety was measured using a short version of the Spence Children's Anxiety Scale (SCAS-S), a tool  
182 used to assess self-reported anxiety symptoms in children and adolescents. The questionnaire includes  
183 19 items for example "I worry about things". Each item is rated on a four-point scale ranging from  
184 'never' to 'always'. The scores are summed up with higher values reflecting more anxiety symptoms  
185 <sup>20</sup>. The cut-off for elevated anxiety symptoms was set at 1 SD above the mean and the cut-off for high  
186 anxiety symptoms was set at 1.5 SD above the mean with separate cut-offs for girls and boys  
187 respectively.

188  
189 These two measures have been validated towards the longer versions and provide a global score for  
190 anxiety/HRQoL rather than a subscore for each domain of HRQoL or cluster of anxiety symptoms <sup>19</sup>  
191 <sup>20</sup>.

### 193 **Physical activity patterns and screen time**

194 Physical activity patterns (time spent in MVPA and SED) were measured using a hip-worn  
195 accelerometer (Actigraph GT3X). The students were told to wear the monitor at all waken times for  
196 the next seven consecutive days (not counting the distribution day), except during water-based  
197 activities. Afterward, the monitors were sent back by the teachers in pre-paid envelopes. Acceleration  
198 was measured at 30 Hz. The accelerometer data were processed in Actilife (v6.13.3) as uniaxial data  
199 using epoch time intervals of 5 seconds. To define non-wear time, 60 minutes of zero counts and no  
200 spike tolerance was used. Further, an individual time filter was created based on the participant's  
201 reported wake/sleep time (extracted from the questionnaire). A second time filter for school time was  
202 created by extracting the times from the school schedules. The criteria for a valid day were at least 500  
203 minutes of wear time. The criteria for a valid measure were at least three valid days (including one  
204 weekend day) for analysis of the whole week, at least two valid weekdays for analysis of school-time  
205 or weekday leisure time, and at least one valid weekend day for analysis of weekends. The data were  
206 categorized into intensities using counts: SED (0-100 counts/minute) and MVPA ( $\geq 2296$   
207 counts/minute) <sup>21</sup>. The first day was excluded to minimize measurement bias <sup>17</sup>.

208  
209 Participation in organized sports was self-reported by the students using the following question "Are  
210 you active in any sports club/organization? (e.g., football, swimming, dancing, scouts, gym)?"  
211 Screen time was self-reported by the students using the following question for weekdays and  
212 weekends. "During a normal weekday/weekend day, approximately how much time do you spend  
213 using a screen (not included schoolwork) including a cell phone, TV, computer, iPad? (For example,  
214 to play games, watch TV, chat, watch serials, YouTube, Snapchat, and Instagram)". The answers were  
215 arranged from no time to 7 hours or more, and were later categorized into two hours and below, three  
216 to four hours, and five hours or above.

## 218 **Covariates**



219 Based on previous studies, parental education, and body mass index standard deviation score (BMIsd,  
220 i.e., BMI adjusted for age and gender) were tested as confounders.

221  
222 Parental education was collected using register data from Statistics Sweden. The parent with the  
223 highest level of education was used and the variable was dichotomized into  $\leq 12$  years and  $> 12$  years.  
224 Gender was self-reported by the student. As the gender group, "other" only included one student, this  
225 observation was excluded in the models stratified by gender. Bodyweight and height were measured  
226 using standardized procedures and rounded to the closest 0.1 kilograms or millimeter. BMI status was  
227 defined according to the International Obesity Task Force<sup>22</sup> and BMI sds was calculated according to  
228 a Swedish reference standard<sup>23</sup>.

### 229 230 **Statistical analysis**

231 Data were analyzed using STATA/SE version 17.0. Descriptive statistics are presented using mean,  
232 standard deviation, and proportions. To compare the difference between boys and girls independent t-  
233 tests were used for numerical variables and chi-square for categorical variables. To investigate the  
234 associations between PA patterns, sports participation screen time (as predictors), and mental health  
235 (as dependent variables) multi-level mixed linear regression models were used to account for the  
236 clustering of students within schools. Two levels were modeled, level 1 for school and level 2 for the  
237 individual student, and a random intercept for each school was applied. We explored both  
238 unstandardized and standardized beta-coefficients for the continuous predictors. The assumptions for  
239 mixed models were tested, and as data displayed heteroskedasticity (Breusch-Pagan test  $p > 0.05$ )  
240 robust estimates were used. All models were adjusted for parental education and accelerometer wear-  
241 time. The models with sports participation were additionally adjusted for time spent in MVPA. As  
242 BMIsds were not significant in any of the models, this covariate was excluded from the final models.  
243 Only students with complete data on the mental health scales were included in the analyzes. All  
244 models were stratified by gender as the PA and mental health outcomes were significantly different  
245 between boys and girls. However, we also explored if gender moderated the associations by running  
246 the same models with all subjects and adding an interaction term. Only significant interaction results  
247 are presented in the text. Crude models are included in Tables 1-2 in the supplemental material.

248  
249 To analyze the effect size in SCAS-S and Kidscreen-10, standardized mean differences (Cohen's d)  
250 were calculated between the low/high tertiles of MVPA, screen time, and participants/ non-  
251 participants in organized sports. The level of statistical significance was set at  $\alpha < 0.05$ , 95%  
252 confidence intervals, and p-values and beta values are bolded to indicate statistical significance.

### 253 254 **RESULTS**

255 In total, 1072 students (94%) completed all items on SCAS-S. Girls reported significantly higher  
256 anxiety scores compared to boys (16.6 vs. 10.6, mean difference of 6.0,  $t(1070) = 13.44$   $p < 0.01$ ). In  
257 girls, 82 (15%) had a score  $> 1$  SD above the mean (elevated anxiety) and 50 (9%) had a score  $> 1.5$   
258 SD above the mean (high anxiety). In boys, the corresponding values were 75 (14%) students and 42  
259 (8%) students. Boys to parents with low education had significantly higher anxiety symptoms (mean  
260 difference 1.6  $t(505) = 2.7$   $p < 0.01$ ) compared to boys with high parental education. This difference was  
261 not observed in girls or for HRQoL.

262  
263 A total of 1096 (96%) students completed all items on the Kidscreen-10 questionnaire where girls  
264 had significantly lower scores of HRQoL (mean difference of 2.63,  $t(1094) = -8.29$   $p < 0.01$ ) compared  
265 to boys. The Cronbach alpha for Kidscreen-10 was 0.78 and 0.84 for SCAS-S, indicating acceptable  
266 to good internal consistency.

267 For the PA measurements, 903 students (79%) had valid accelerometer readings for the whole  
268 week, 1054 students (93%) for weekdays, and 916 (80%) on weekends. There were no significant  
269 differences in mean values of SCAS-S or Kidscreen-10 between those who had a valid accelerometer  
270 reading and those who did not.

271

**Table 1.** Descriptive characteristics of the study sample by gender (mean ± SD unless otherwise specified)

|                                        | n    | missing | All          | n   | Girls         | n   | Boys         | Sig. p           |
|----------------------------------------|------|---------|--------------|-----|---------------|-----|--------------|------------------|
| <b>Total</b>                           |      |         | 1139 (100)   |     | 580 (51.0)    |     | 558 (49.0)   |                  |
| Age (year)                             | 1139 | 0       | 13.4 ± 0.3   |     | 13.4 ± 0.3    |     | 13.4 ± 0.4   | 0.147            |
| Parental education, >12 years n (%)    | 1102 | 37      | 730 (66.2)   |     | 371 (65.9)    |     | 358 (66.5)   | 0.821            |
| Student country of birth, Sweden n (%) | 1129 | 10      | 967 (85.7)   |     | 490 (84.9)    |     | 476 (86.4)   | 0.758            |
| <b>BMI status<sup>1</sup></b>          | 1134 | 5       |              | 580 |               | 554 |              | 0.203            |
| Underweight n (%)                      |      |         | 89 (7.8)     |     | 38 (6.6)      |     | 51 (9.2)     |                  |
| Normal weight n (%)                    |      |         | 815 (71.8)   |     | 430 (74.1)    |     | 384 (69.3)   |                  |
| Overweight n (%)                       |      |         | 179 (15.8)   |     | 89 (15.3)     |     | 90 (16.2)    |                  |
| Obese n (%)                            |      |         | 52 (4.6)     |     | 23 (4.0)      |     | 29 (5.2)     |                  |
| <b>BMI sds<sup>2</sup></b>             | 1134 | 5       | 0.36±1.23    | 580 | 0.45±1.11     | 554 | 0.26±1.35    | <b>0.012</b>     |
| <b>Sedentary time (min)</b>            |      |         |              |     |               |     |              |                  |
| SED (average week)                     | 903  | 236     | 602.0 ± 66.6 | 490 | 608.9 ± 62.65 | 413 | 593.7 ± 70.2 | <b>&lt;0.001</b> |
| SED bouts over 10 min                  | 903  | 236     | 122.7 ± 63.6 | 490 | 132.8 ± 63.2  | 413 | 110.7 ± 62.2 | <b>&lt;0.001</b> |
| SED leisure time (weekdays)            | 1054 | 85      | 324.8 ± 69.2 | 548 | 330.0 ± 63.5  | 506 | 319.2 ± 74.7 | <b>0.011</b>     |
| SED leisure time (weekend)             | 916  | 223     | 539.4 ± 84.7 | 497 | 533.8 ± 80.0  | 419 | 546.1 ± 89.6 | <b>0.029</b>     |
| SED school time                        | 1054 | 85      | 291.9 ± 37.5 | 548 | 301.7 ± 35.7  | 506 | 281.2 ± 36.5 | <b>&lt;0.001</b> |
| <b>MVPA time (min)</b>                 |      |         |              |     |               |     |              |                  |
| MVPA (average week)                    | 903  | 236     | 52.0 ± 19.0  | 490 | 49.52 ± 17.7  | 413 | 54.86 ± 20.1 | <b>&lt;0.001</b> |
| MVPA leisure time (weekdays)           | 1054 | 85      | 31.6 ± 15.0  | 548 | 30.9 ± 13.8   | 506 | 32.3 ± 16.1  | 0.145            |
| MVPA leisure time (weekend)            | 916  | 223     | 37.9 ± 25.3  | 497 | 36.8 ± 23.3   | 419 | 39.1 ± 27.4  | 0.156            |
| MVPA school time                       | 1054 | 85      | 26.5 ± 11.2  | 548 | 23.2 ± 9.6    | 506 | 30.1 ± 11.7  | <b>&lt;0.001</b> |
| Reached the MVPA recommendations n (%) | 903  | 236     | 273 (30.2)   | 490 | 121 (24.7)    | 413 | 152 (36.8)   | <b>&lt;0.001</b> |
| <b>Accelerometer wear time</b>         | 903  | 236     |              | 490 |               | 413 |              |                  |
| Wear time (average week)               |      |         | 792.6 ± 60.8 |     | 796.0 ± 58.1  |     | 788.5 ± 63.8 | 0.067            |
| Total included valid days              |      |         | 6.0 ± 1.1    |     | 6.2 ± 1.0     |     | 5.8 ± 1.1    | <b>&lt;0.001</b> |
| <b>Organized sports</b>                |      |         |              |     |               |     |              |                  |
| Participated in organized sports n (%) |      |         | 787 (72.0)   |     | 396 (71.4)    |     | 391 (72.7)   | 0.626            |
| <b>Screen time (weekdays)</b>          | 1125 | 14      |              | 575 |               | 550 |              | 0.842            |
| ≤2 hours n (%)                         |      |         | 359 (32.0)   |     | 179 (31.1)    |     | 180 (32.7)   |                  |
| 3-4 hours n (%)                        |      |         | 515 (46.0)   |     | 267 (46.4)    |     | 248 (45.1)   |                  |
| ≥5 hours n (%)                         |      |         | 251 (22.3)   |     | 129 (22.4)    |     | 122 (22.2)   |                  |
| <b>Screen time (weekend)</b>           | 1122 | 17      |              | 576 |               | 546 |              | <b>&lt;0.001</b> |
| ≤2 hours n (%)                         |      |         | 178 (15.9)   |     | 70 (12.2)     |     | 108 (19.8)   |                  |
| 3-4 hours n (%)                        |      |         | 411 (36.6)   |     | 238 (41.3)    |     | 173 (31.7)   |                  |
| ≥5 hours n (%)                         |      |         | 533 (47.5)   |     | 268 (46.6)    |     | 265 (48.5)   |                  |
| <b>Mental health</b>                   |      |         |              |     |               |     |              |                  |
| SCAS-S                                 | 1072 | 67      | 13.7 ± 7.9   | 547 | 16.6 ± 8.0    | 525 | 10.6 ± 6.6   | <b>&lt;0.001</b> |
| Kidscreen-10                           | 1096 | 43      | 39.6 ± 5.4   | 562 | 38.3 ± 5.2    | 534 | 41.0 ± 5.3   | <b>&lt;0.001</b> |
| Kidscreen-10 <sup>T</sup>              | 1096 | 43      | 49.6 ± 9.0   | 562 | 47.3 ± 7.5    | 534 | 51.9 ± 9.8   | <b>&lt;0.001</b> |

<sup>1</sup>BMI status according to IOTF 2012, <sup>2</sup> BMI sds according to a Swedish reference standard.

MVPA moderate-to-vigorous physical activity, SED sedentary time, SCAS-S Short version of the Spence Children’s Anxiety Scale,

<sup>T</sup>international T-values based on Rasch person parameter

272 On an average day, boys spent significantly more in MVPA. However, when breaking down the  
 273 MVPA between domains, this difference was only significant during school time (mean difference of  
 274 6.9 min,  $t(1052) = -10.56$   $p < 0.01$ ). Students who participated in organized sports had 11.3 more  
 275 minutes per day in MVPA compared to those who did not participate  $t(874) = -8.10$   $p < 0.01$ . Similarly,  
 276 the group who reported low screen time (≤2 hours) on weekends spent 15 more minutes in MVPA  
 277 compared to those who reported five hours or more  $t(568) = 6.32$   $p < 0.01$ . Table 2 shows the  
 278 associations between anxiety (SCAS-S) and health-related quality of life (Kidscreen-10) and  
 279 predictors using multi-level mixed linear regression models.

**Table 2.** Associations between predictors and anxiety (SCAS-S) and health-related quality of life (Kidsscreen-10) were analyzed with multi-level mixed linear regression models stratified by gender

| Model                             | Anxiety (SCAS-S) |                                |                   |      |                                |                   | Health-related quality of life (Kidsscreen-10) |                                |                   |      |                                |                   |
|-----------------------------------|------------------|--------------------------------|-------------------|------|--------------------------------|-------------------|------------------------------------------------|--------------------------------|-------------------|------|--------------------------------|-------------------|
|                                   | Girls            |                                |                   | Boys |                                |                   | Girls                                          |                                |                   | Boys |                                |                   |
|                                   | n                | Unstandardized B (95% CI)      | Standardized beta | n    | Unstandardized B (95% CI)      | Standardized beta | n                                              | Unstandardized B (95% CI)      | Standardized beta | n    | Unstandardized B (95% CI)      | Standardized beta |
| <b>1. MVPA</b>                    |                  |                                |                   |      |                                |                   |                                                |                                |                   |      |                                |                   |
| 1.1 MVPA whole week               | 448              | <b>-0.045 (-0.079, -0.011)</b> | <b>-0.099</b>     | 383  | -0.026 (-0.058, 0.007)         | -0.077            | 458                                            | <b>0.032 (0.009, 0.054)</b>    | <b>0.110</b>      | 390  | <b>0.040 (0.015, 0.065)</b>    | <b>0.157</b>      |
| 1.2 MVPA leisure time (weekdays)  | 503              | <b>-0.091 (-0.134, -0.049)</b> | <b>-0.161</b>     | 468  | <b>-0.038 (-0.066, -0.010)</b> | <b>-0.095</b>     | 514                                            | <b>0.048 (0.023, 0.073)</b>    | <b>0.130</b>      | 477  | <b>0.036 (0.011, 0.061)</b>    | <b>0.100</b>      |
| 1.3 MVPA leisure time (weekend)   | 455              | -0.023 (-0.049, 0.002)         | -0.067            | 388  | -0.001 (-0.024, 0.021)         | -0.005            | 465                                            | <b>0.023 (0.033, 0.043)</b>    | <b>0.105</b>      | 396  | <b>0.034 (0.020, 0.048)</b>    | <b>0.183</b>      |
| 1.4 MVPA school time              | 503              | -0.027 (-0.100, 0.047)         | -0.032            | 468  | 0.015 (-0.039, 0.069)          | 0.027             | 514                                            | 0.013 (-0.033, 0.059)          | 0.025             | 477  | 0.020 (-0.024, 0.064)          | 0.046             |
| <b>2. SED</b>                     |                  |                                |                   |      |                                |                   |                                                |                                |                   |      |                                |                   |
| 2.1 SED whole week                | 448              | 0.011 (-0.007, 0.028)          | 0.081             | 383  | 0.011 (-0.006, 0.028)          | 0.114             | 458                                            | <b>-0.021 (-0.032, -0.009)</b> | <b>-0.251</b>     | 390  | <b>-0.021 (-0.033, -0.008)</b> | <b>-0.285</b>     |
| 2.2 SED bouts (10 min) whole week | 448              | -0.001 (-0.014, 0.012)         | -0.009            | 383  | 0.002 (-0.009, 0.013)          | 0.021             | 458                                            | <b>-0.012 (-0.020, -0.005)</b> | <b>-0.150</b>     | 390  | <b>-0.009 (-0.017, -0.001)</b> | <b>-0.113</b>     |
| 2.3 SED leisure time (weekdays)   | 503              | <b>0.040 (0.017, 0.062)</b>    | <b>0.315</b>      | 468  | 0.017 (-0.002, 0.036)          | 0.195             | 514                                            | <b>-0.034 (-0.051, -0.017)</b> | <b>-0.421</b>     | 477  | <b>-0.020 (-0.036, -0.005)</b> | <b>-0.299</b>     |
| 2.4 SED leisure time (weekend)    | 455              | 0.007 (-0.006, 0.020)          | 0.064             | 388  | 0.003 (-0.009, 0.014)          | 0.035             | 465                                            | <b>-0.013 (-0.022, -0.003)</b> | <b>-0.192</b>     | 396  | <b>-0.017 (-0.025, -0.009)</b> | <b>-0.299</b>     |
| 2.5 SED school                    | 503              | -0.009 (-0.039, 0.021)         | -0.041            | 468  | -0.011 (-0.034, 0.012)         | -0.062            | 514                                            | -0.001 (-0.026, 0.001)         | -0.060            | 477  | -0.012 (-0.033, 0.001)         | -0.083            |
| <b>3. Organized sports</b>        |                  |                                |                   |      |                                |                   |                                                |                                |                   |      |                                |                   |
| Did not participate               | 112              | ref                            |                   | 97   | ref                            |                   | 114                                            | ref                            |                   | 99   | ref                            |                   |
| Participated                      | 321              | -0.210 (-2.165, 1.745)         |                   | 283  | <b>-1.810 (-3.492, -0.129)</b> |                   | 329                                            | -0.258 (-1.701, 1.185)         |                   | 288  | 1.214 (-0.459, 2.888)          |                   |
| <b>4. Screen time weekday</b>     |                  |                                |                   |      |                                |                   |                                                |                                |                   |      |                                |                   |
| ≤2 hours                          | 162              | ref                            |                   | 167  | ref                            |                   | 166                                            | ref                            |                   | 167  | ref                            |                   |
| 3-4 hours                         | 253              | 0.628 (-0.975, 2.231)          |                   | 230  | 0.342 (-0.782, 1.466)          |                   | 256                                            | <b>-1.337 (-2.175, -0.499)</b> |                   | 237  | -0.785 (-1.758, 0.188)         |                   |
| ≥5 hours                          | 116              | <b>4.056 (1.935, 6.176)</b>    |                   | 110  | 0.883 (-0.583, 2.348)          |                   | 121                                            | <b>-3.503 (-4.786, -2.220)</b> |                   | 111  | <b>-1.539 (-2.664, -0.413)</b> |                   |
| <b>5. Screen time weekend</b>     |                  |                                |                   |      |                                |                   |                                                |                                |                   |      |                                |                   |
| ≤2 hours                          | 61               | ref                            |                   | 98   | ref                            |                   | 65                                             | ref                            |                   | 99   | ref                            |                   |
| 3-4 hours                         | 219              | 1.155 (-0.582, 3.369)          |                   | 164  | -0.151 (-1.776, 1.473)         |                   | 225                                            | -0.904 (-2.315, 0.506)         |                   | 166  | 0.157 (-1.725, 1.411)          |                   |
| ≥5 hours                          | 252              | <b>3.340 (1.394, 5.287)</b>    |                   | 243  | 1.060 (-0.207, 2.326)          |                   | 254                                            | <b>-2.520 (-4.014, -1.027)</b> |                   | 248  | -0.842 (-2.320, 0.636)         |                   |

B unstandardized coefficients, beta standardized coefficients, CI confidence interval  
 MVPA Moderate-to-vigorous physical activity, SED sedentary time, SCAS-S Short version of the Spence Children’s Anxiety Scale  
 All models were adjusted for parental education  
 Model 3 were adjusted for time spent in MVPA  
 Models 1-3 were adjusted for accelerometer wear-time

280

### Associations between PA patterns, screen time, and anxiety (SCAS-S)

A significant inverse association between time spent in MVPA during leisure time on weekdays and anxiety was seen in girls and boys there was a significant interaction of gender in this association ( $p$  0.01), such that the association was stronger in girls compared to boys. Time spent in MVPA over the whole week was only significantly associated with anxiety in girls, none of the other MVPA measured was significantly associated with anxiety among girls or boys. Boys who participated in organized sports also had a significantly lower prevalence of anxiety, compared to boys who did not participate. This association was not significant in girls.

In girls, time spent in SED during leisure time on weekdays was positively associated with anxiety. None of the other SED measures was significantly associated with anxiety in girls or boys.

With regards to screen time, significant associations were only found in the group of girls who reported  $\geq 5$  hours screen time on weekdays or weekends. These groups had significantly higher anxiety scores compared to those who reported up to 2 hours. When controlling for MVPA, this association remained significant ( $B=3.39$ , CI: 1.33, 5.46) for weekdays and ( $B=2.53$ , CI: 0.27, 4.80) for weekends. Further, there was a significant interaction of gender in the association between screen-time on weekends and anxiety with a stronger association among girls compared to boys ( $p<0.03$ ) in the group who reported  $\geq 5$  hours screen time.

### Associations between PA pattern, screen time, and health-related quality of life (Kiddscreen-10)

There was a positive association between time spent in MVPA during the whole week, during leisure time on weekdays, on weekends, and HRQoL in girls and boys. There was a positive association between sports participation and HRQoL in boys, however, the significance disappeared after controlling for time spent in MVPA.

Inverse associations were seen between all SED time domains and HRQoL in both boys and girls, except SED during school time. There was a significant interaction of gender in the association between time spent in SED on weekends and HRQoL ( $p$  0.04) with a stronger association in boys compared to girls.

Girls and boys who reported  $\geq 5$  hours screen time on weekdays had significantly lower HRQoL, compared to those who reported two hours or less. The results remained significant also after adjusting for time spent in MVPA ( $B=-3.32$ , CI: -4.50, -2.14 in girls, and  $B=-1.65$  CI: -2.70, -0.61 in boys). A significant association between screen time on weekends and HRQoL was only found in girls who reported  $\geq 5$  hours of screen time.

Figure 2 shows the unadjusted mean SCAS-S score and Kiddscreen-10 scores between students reporting different levels of screen time on weekdays.

**[Figure 2 should be inserted here]**

To assess the clinical significance, we calculated effect sizes (Cohen's  $d$ ) in mental health scores between participants/non-participants in organized sports, low/high screen time, and in low/high tertiles of MVPA. The average time (minutes) for MVPA in the lowest tertile was 32 and 34, and in the highest tertile 70 and 78 for girls and boys, respectively. Regarding SCAS-S, the effect sizes between low/high MVPA groups were 0.18 in girls (CI: -0.05, 0.40) and 0.31 in boys (0.07, 0.56). The effect sizes between participants/non-participants in organized sports were 0.13 (CI: -0.07, 0.31) in girls and 0.31 (CI: 0.12, 0.51) in boys. The effect sizes between groups with low/high screen time on weekdays were -0.47 in girls (CI: -0.70, -0.23) and -0.18 in boys (CI: -0.42, 0.05) and on weekends -0.36 in girls (CI: -0.64, -0.09) and -0.17 (CI: -0.40, 0.06) in boys.

For Kiddscreen-10 the results showed that the effect sizes between low/high MVPA groups were -0.28 in girls (CI: -0.50, -0.06) and -0.51 in boys (CI: -0.75, -0.26) and between participants/non-participants in organized sports -0.01 (CI: -0.20, 0.18) in girls and -0.28 (CI: -0.47, -0.08) in boys. Between groups with high/low screen time on weekdays, the effect sizes were 0.59 in girls (CI: 0.36, 0.83) and 0.35 in boys (CI: 0.12, 0.59) and on weekends 0.50 (CI 0.23, 0.77) and 0.14 (CI: -0.9, 0.36) for girls and boys respectively (these results can be found in table 3 the supplemental material).

## DISCUSSION

In this cross-sectional study, the associations between PA patterns, sports participation, screen time, and mental health (anxiety and HRQoL) were investigated in Swedish adolescents. MVPA was positively associated with HRQoL whereas time spent in SED or using screens on weekdays was inversely associated. Although the effect sizes generally were small, the largest effect sizes were observed between the high/low MVPA group in boys and between the high/low screen time group in girls. With regards to anxiety, high MVPA during leisure time on weekdays was associated with low anxiety scores. Some gender differences were observed, boys participating in organized sports had low anxiety scores whereas girls who reported five hours or more of screen time had high anxiety scores.

The mean Kidscreen-10 score in our sample was 38.3 in girls and 41.0 in boys, which corresponds to a T-score of 47.3 in girls and 51.9 in boys. A suggested threshold to classify the values as “normal” is  $\frac{1}{2}$  SD above or below the reference value<sup>24</sup>. This indicates that our sample was within this range of the Swedish reference population (12-18-year-olds) with a T-score of 49.2 for girls and 52.4 for boys<sup>24</sup>. The current sample also had similar PA levels (on average 52 minutes in MVPA per day) and demographic characteristics (66% had parents with  $\geq 12$  years of education, 86% were born in Sweden and 21% had overweight or obesity) compared to a nationally representative study in Swedish adolescents which reported on average 53 minutes in MVPA per day, 61% with high parental education, 88% born in Sweden, 21% with overweight or obesity<sup>14</sup>.

The most common limitation in previous studies is the lack of detailed measures of PA. The current study used device-measured PA and could confirm many findings based on self-reported PA. One example is a review that found PA to be positively associated with HRQoL and a high proportion of SED to be associated with lower HRQoL<sup>25</sup>. In general, the effect sizes in the current study were small, which is not uncommon in these types of studies. A previous study by Gopinath et al. found similar mean differences in HRQoL between the high/low group of PA and screen time<sup>26</sup>. However, this study did not stratify the analysis by gender. In our study, we found the largest effect sizes when comparing the lowest and highest tertiles of MVPA for boys (Cohen's  $d = 0.51$ ), and screen time for girls (Cohen's  $d = 0.50$  on weekends) and (Cohen's  $d = 0.59$  on weekdays). Our findings suggest that the strengths of the associations to HRQoL could be different for boys and girls and these gender differences should be considered when designing future intervention studies to improve HRQoL.

Regarding screen time, this study found high screen time during weekdays to be associated with lower HRQoL which confirms the findings of a review that concluded moderate evidence for the association between screen time and HRQoL. In the current study, we found a significant difference in MVPA between the low/high screen time group. Interestingly, after controlling for time spent in MVPA screen time was still significantly associated with HRQoL independently of MVPA in both genders. As previously mentioned, we found the effect size of screen time to be larger in girls. These findings are similar to a study from the UK which concluded that the association between screen time and mental health was stronger in girls. The same study also found that the dose of screen time associated with problematic mental health was lower for girls ( $>2$  hours) compared to boys ( $>5$  hours)<sup>27</sup>. This was also evident in the current study, where screen time  $>3$  hours were associated with lower HRQoL in girls, whereas for boys this association was significant only for the group reporting  $\geq 5$  hours.

A strength of this study is the inclusion of both a positive and a negative indicator of mental health, which shows that the type of PA pattern and screen time associated with each measure differs. Fewer measures of the PA pattern and screen time were significantly associated with anxiety compared to HRQoL. MVPA during leisure time on weekdays was inversely associated with anxiety in both genders. These results are consistent with those reported previously using self-reported PA<sup>28</sup><sup>29</sup>. However, we only found sports participation to be associated with lower anxiety in boys. These findings were different from a study in 14-year-old that found sports participation to be significantly associated with lower anxiety and higher well-being in both genders<sup>30</sup>. Potential explanations for this could be that the study did not control for time spent in MVPA and that sports participation was lower (33%) compared to 72% in our study. Another study in older youth found that the significant association between sports participation and anxiety disappeared after controlling for time spent in

1  
2  
3  
4  
5 MVPA<sup>12</sup>. Previous studies have also suggested that the strength of the association could vary between  
6 genders. A review found a weak negative correlation between sports participation and anxiety, but in  
7 samples with a higher proportion of boys, the correlation was stronger<sup>31</sup>. One potential explanation for  
8 the gender differences observed in the current study could be related to the context and sports  
9 environment. Where girls have reported a higher incidence of teasing during sports participation and  
10 participation in sports common to girls (aesthetic sports such as dance or gymnastics) have been  
11 associated with body image concerns and disordered eating<sup>32</sup>. This indicates that depending on the  
12 sports culture the association between sports participation and mental health could differ between  
13 genders, this should be investigated further in future research.  
14

15  
16 About screen time, this study found that girls reporting  $\geq 5$  hours of screen time on weekdays and  
17 weekends had higher levels of anxiety compared to those who reported  $\leq 2$  hours. This association was  
18 not seen in boys. These findings were consistent with a study in Icelandic adolescents, that found  
19 screen time  $< 5$  hours to be associated with fewer symptoms of anxiety and depression<sup>29</sup>. However, the  
20 results were not stratified by gender. Although not investigated in the current study, one suggested  
21 explanation for the gender differences in the type of screen time activity. A review found social media  
22 use to be associated with anxiety, with a stronger association in girls<sup>33</sup>, future studies should further  
23 investigate these associations.  
24

25  
26 There is a lack of studies that investigate the association between device-measured SED and  
27 mental health and many studies rely on screen time as a proxy for SED. In the current study, stronger  
28 associations were seen in the standardized beta coefficients for the SED measurements (especially  
29 during leisure time weekdays), compared to MVPA. This was seen in both genders for HRQoL and  
30 anxiety for girls. A review concluded that sedentary behaviors were associated with an increased risk  
31 of anxiety, with the strongest associations found in sitting<sup>34</sup>. However, it is important to note that  
32 causation or the direction of these associations cannot be studied in cross-sectional studies.  
33 Interestingly, a randomized controlled trial (RCT) showed significantly higher anxiety levels in the  
34 intervention group after a one-week intervention of increased SED and eliminated PA compared to the  
35 control group, which continued their normal PA routine<sup>35</sup>. These findings suggest that reducing SED  
36 could be a strategy to improve mental health among adolescents, although this should be investigated  
37 further in larger RCT studies.  
38

39  
40 A limitation of the current study was the lack of questions concerning functioning to further  
41 understand if the group with low mental health experienced impairment in their daily lives. However,  
42 including a positive and negative measure still provides a better understanding of the students' overall  
43 mental health compared to studies that only focus on symptoms of mental illness. Another limitation  
44 was the cross-sectional design, which makes it impossible to study the direction or cause of these  
45 relationships. A strength was the relatively large sample size and a high participation rate (73%),  
46 which resulted in a non-homogenous study population of adolescents with different PA levels and  
47 mental health scores. Further, PA was assessed using a detailed PA measure (accelerometer) with  
48 individual time filters, which enabled comparisons between different time domains.  
49

## 50 CONCLUSIONS

51 This cross-sectional study showed that MVPA was associated with better mental health, whereas SED  
52 or screen time was associated with lower mental health. However, these associations were not  
53 significant throughout all time domains and some gender differences were observed. Our results could  
54 create a paradigm for future studies to decide which types of PA patterns and time domains to target in  
55 intervention studies with the aim improve mental health among adolescents.  
56  
57  
58  
59  
60

## LEGENDS

**Figure 1.** Participation of schools and students.

**Figure 2.** Unadjusted means SCAS-S and Kidscreen-10 score between screen time groups, mean comparisons were analyzed using an Analysis of variance ANOVA and Bonferroni post hoc test  
\*\*\* p <0.001 \*\* p <0.01

## DECLARATIONS

**Acknowledgments:** We want to thank all the students, their parents, and the teachers involved in the study. We would also like to thank the hard-working research personnel involved in the data collection making this study possible.

**Competing interests:** The authors have no competing interests relevant to this article to declare.

**Funding:** This study is part of the “Physical activity for healthy brain functions in school youth”, which was funded by the Knowledge Foundation (grant 20180040) and conducted in collaboration with Coop, IKEA, Skanska, Skandia, Stockholm Consumer Cooperative Society, and the Swedish Crown Princess Couple’s Foundation/Generation Pep.

**Data sharing:** The datasets are not available for download to protect the confidentiality of the participants. The data are held at The Swedish School of Sport and Health Sciences.

**Authors' contributions:** KK recruited the schools. GN, ÖE, BH, KK designed the study and participated in the data collection. BH cleaned and processed the data. JÅ contributed to the design of the statistical model and the interpretation of the results. KK drafted the manuscript. All authors read and approved the final manuscript as submitted and agree to be accountable for all aspects of the work.

**REFERENCES**

1. World Health Organization. Basic documents: World Health Organization, 2020.
2. Gore FM, Bloem PJ, Patton GC, et al. Global burden of disease in young people aged 10–24 years: a systematic analysis. *The Lancet* 2011;377(9783):2093-102.
3. Patel V, Flisher AJ, Hetrick S, et al. Mental health of young people: a global public-health challenge. *the Lancet* 2007;369(9569):1302-13.
4. Solmi M, Radua J, Olivola M, et al. Age at onset of mental disorders worldwide: large-scale meta-analysis of 192 epidemiological studies. *Mol Psychiatr* 2021:1-15.
5. Polanczyk GV, Salum GA, Sugaya LS, et al. Annual research review: A meta-analysis of the worldwide prevalence of mental disorders in children and adolescents. *Journal of child psychology and psychiatry* 2015;56(3):345-65.
6. Bell SL, Audrey S, Gunnell D, et al. The relationship between physical activity, mental wellbeing and symptoms of mental health disorder in adolescents: a cohort study. *International Journal of Behavioral Nutrition and Physical Activity* 2019;16(1):138.
7. McMahon EM, Corcoran P, O'Regan G, et al. Physical activity in European adolescents and associations with anxiety, depression and well-being. *European child & adolescent psychiatry* 2017;26(1):111-22.
8. Kremer P, Elshaug C, Leslie E, et al. Physical activity, leisure-time screen use and depression among children and young adolescents. *Journal of science and medicine in sport* 2014;17(2):183-87.
9. Sigvartsen J, Gabrielsen LE, Abildsnes E, et al. Exploring the relationship between physical activity, life goals and health-related quality of life among high school students: a cross-sectional study. *BMC public health* 2016;16(1):709.
10. Biddle SJ, Ciaccioni S, Thomas G, et al. Physical activity and mental health in children and adolescents: An updated review of reviews and an analysis of causality. *Psychology of Sport and Exercise* 2018
11. Kleppang AL, Hartz I, Thurston M, et al. The association between physical activity and symptoms of depression in different contexts—a cross-sectional study of Norwegian adolescents. *BMC public health* 2018;18(1):1368.
12. Doré I, O'Loughlin JL, Beauchamp G, et al. Volume and social context of physical activity in association with mental health, anxiety and depression among youth. *Preventive Medicine* 2016;91:344-50.
13. Guthold R, Stevens GA, Riley LM, et al. Global trends in insufficient physical activity among adolescents: a pooled analysis of 298 population-based surveys with 1· 6 million participants. *The Lancet Child & Adolescent Health* 2019
14. Nyberg G, Kjellenberg K, Fröberg A, et al. A national survey showed low levels of physical activity in a representative sample of Swedish adolescents. *Acta Paediatrica* 2020
15. Hoare E, Milton K, Foster C, et al. The associations between sedentary behaviour and mental health among adolescents: a systematic review. *International journal of behavioral nutrition and physical activity* 2016;13(1):108.
16. Liu M, Wu L, Yao S. Dose–response association of screen time-based sedentary behaviour in children and adolescents and depression: a meta-analysis of observational studies. *Br J Sports Med* 2016;50(20):1252-58.
17. Corder K, Ekelund U, Steele RM, et al. Assessment of physical activity in youth. *Journal of applied physiology* 2008;105(3):977-87.
18. Nyberg G, Ekblom Ö, Kjellenberg K, et al. Associations between the School Environment and Physical Activity Pattern during School Time in Swedish Adolescents. *International Journal of Environmental Research and Public Health* 2021;18(19):10239.
19. Ravens-Sieberer U, Erhart M, Rajmil L, et al. Reliability, construct and criterion validity of the KIDSCREEN-10 score: a short measure for children and adolescents' well-being and health-related quality of life. *Quality of Life Research* 2010;19(10):1487-500.



- 1
- 2
- 3
- 4
- 5 20. Ahlen J, Vigerland S, Ghaderi A. Development of the Spence Children's Anxiety Scale-Short
- 6 Version (SCAS-S). *Journal of psychopathology and behavioral assessment* 2018;40(2):288-
- 7 304.
- 8 21. Evenson KR, Catellier DJ, Gill K, et al. Calibration of two objective measures of physical activity for
- 9 children. *Journal of sports sciences* 2008;26(14):1557-65.
- 10 22. Cole TJ, Lobstein T. Extended international (IOTF) body mass index cut-offs for thinness,
- 11 overweight and obesity. *Pediatric obesity* 2012;7(4):284-94.
- 12 23. Karlberg J, Luo Z, Albertsson-Wikland K. Body mass index reference values (mean and SD) for
- 13 Swedish children. *Acta Paediatrica* 2001;90(12):1427-34.
- 14 24. KIDSCREEN Group. Europe.(2006). The KIDSCREEN questionnaires: quality of life questionnaires
- 15 for children and adolescents. *Handbook Lengerich Pabst Science Publishers, Germany* 2011
- 16 25. Wu XY, Han LH, Zhang JH, et al. The influence of physical activity, sedentary behavior on health-
- 17 related quality of life among the general population of children and adolescents: A
- 18 systematic review. *PloS one* 2017;12(11):e0187668.
- 19 26. Gopinath B, Hardy LL, Baur LA, et al. Physical activity and sedentary behaviors and health-related
- 20 quality of life in adolescents. *Pediatrics* 2012;130(1):e167-e74.
- 21 27. Twenge JM, Farley E. Not all screen time is created equal: associations with mental health vary by
- 22 activity and gender. *Social psychiatry and psychiatric epidemiology* 2021;56(2):207-17.
- 23 28. Bélair MA, Kohen DE, Kingsbury M, et al. Relationship between leisure time physical activity,
- 24 sedentary behaviour and symptoms of depression and anxiety: evidence from a population-
- 25 based sample of Canadian adolescents. *BMJ Open* 2018;8(10):e021119. doi:
- 26 10.1136/bmjopen-2017-021119 [published Online First: 2018/10/20]
- 27 29. Hrafnkelsdottir SM, Brychta RJ, Rognvaldsdottir V, et al. Less screen time and more frequent
- 28 vigorous physical activity is associated with lower risk of reporting negative mental health
- 29 symptoms among Icelandic adolescents. *PLoS One* 2018;13(4):e0196286. doi:
- 30 10.1371/journal.pone.0196286 [published Online First: 2018/04/27]
- 31 30. McMahon EM, Corcoran P, O'Regan G, et al. Physical activity in European adolescents and
- 32 associations with anxiety, depression and well-being. *Eur Child Adolesc Psychiatry*
- 33 2017;26(1):111-22. doi: 10.1007/s00787-016-0875-9 [published Online First: 2016/06/10]
- 34 31. Panza MJ, Graupensperger S, Agans JP, et al. Adolescent sport participation and symptoms of
- 35 anxiety and depression: A systematic review and meta-analysis. *Journal of sport and exercise*
- 36 *psychology* 2020;42(3):201-18.
- 37 32. Slater A, Tiggemann M. Gender differences in adolescent sport participation, teasing, self-
- 38 objectification and body image concerns. *Journal of adolescence* 2011;34(3):455-63.
- 39 33. Keles B, McCrae N, Grealish A. A systematic review: the influence of social media on depression,
- 40 anxiety and psychological distress in adolescents. *International Journal of Adolescence and*
- 41 *Youth* 2020;25(1):79-93.
- 42 34. Allen MS, Walter EE, Swann C. Sedentary behaviour and risk of anxiety: a systematic review and
- 43 meta-analysis. *Journal of Affective Disorders* 2019;242:5-13.
- 44 35. Edwards MK, Loprinzi PD. Experimentally increasing sedentary behavior results in increased
- 45 anxiety in an active young adult population. *Journal of affective disorders* 2016;204:166-73.
- 46
- 47
- 48
- 49
- 50
- 51
- 52
- 53
- 54
- 55
- 56
- 57
- 58
- 59
- 60

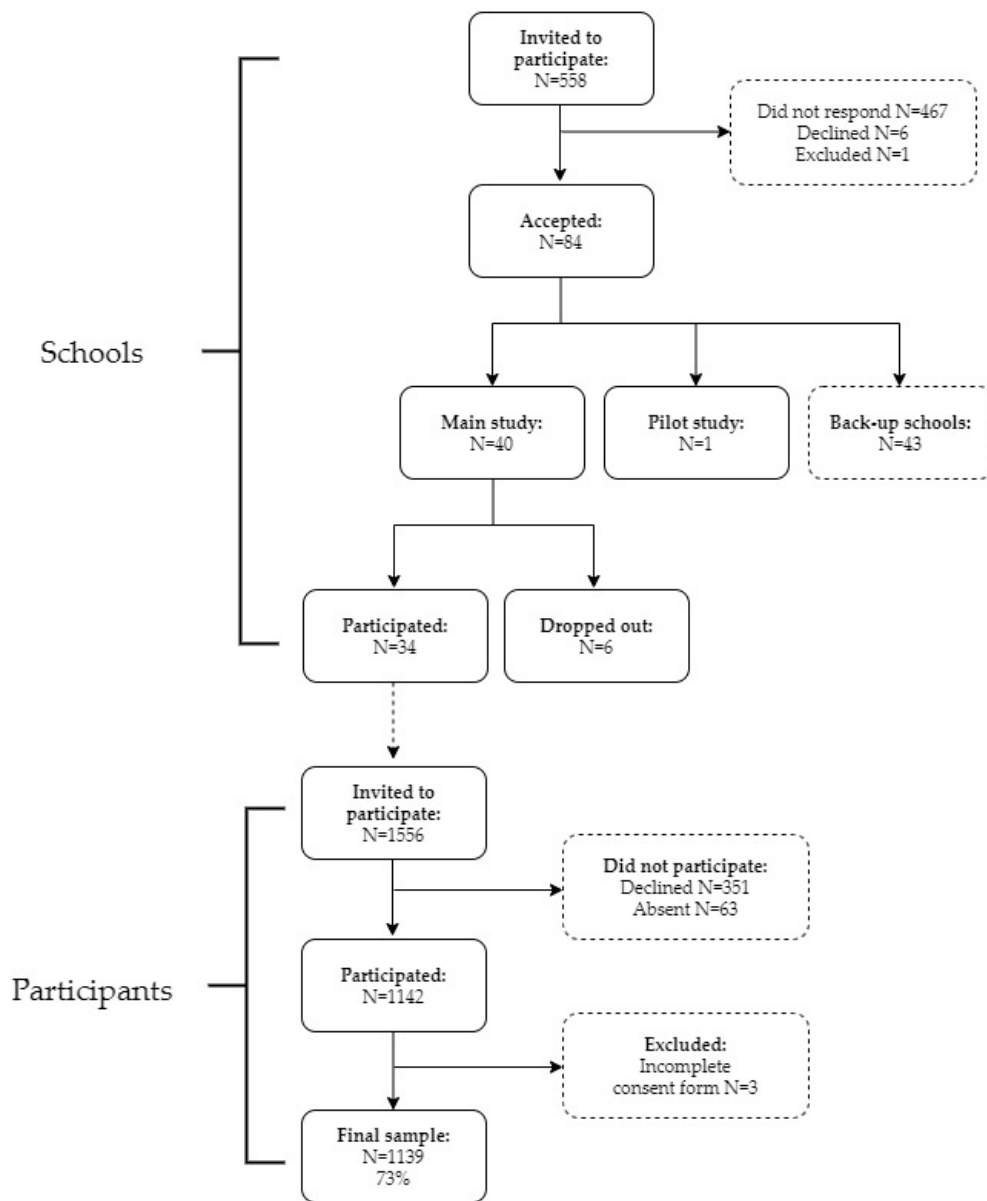

228x275mm (72 x 72 DPI)

1  
2  
3  
4  
5  
6  
7  
8  
9  
10  
11  
12  
13  
14  
15  
16  
17  
18  
19  
20  
21  
22  
23  
24  
25  
26  
27  
28  
29  
30  
31  
32  
33  
34  
35  
36  
37  
38  
39  
40  
41  
42  
43  
44  
45  
46  
47  
48  
49  
50  
51  
52  
53  
54  
55  
56  
57  
58  
59  
60

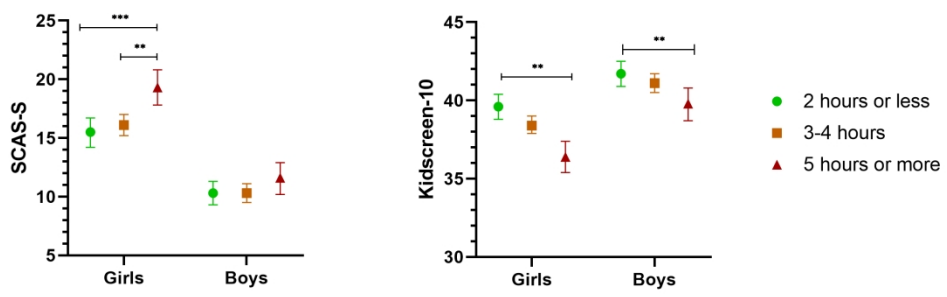

216x87mm (300 x 300 DPI)

**SUPPLEMENTAL MATERIAL**

**Supplemental material 1.** Crude and adjusted associations between predictors and anxiety (SCAS-S) and health-related quality of life (Kidsscreen-10) were analyzed with multi-level mixed linear regression models

| Model                             | Anxiety (SCAS-S) |                                |                   |          |                                |                   | Health-related quality of life (Kidsscreen-10) |                                 |                   |          |                                |                   |
|-----------------------------------|------------------|--------------------------------|-------------------|----------|--------------------------------|-------------------|------------------------------------------------|---------------------------------|-------------------|----------|--------------------------------|-------------------|
|                                   | Crude            |                                |                   | Adjusted |                                |                   | Crude                                          |                                 |                   | Adjusted |                                |                   |
|                                   | n                | Unstandardized B (95% CI)      | Standardized beta | n        | Unstandardized B (95% CI)      | Standardized beta | n                                              | Unstandardized B (95% CI)       | Standardized beta | n        | Unstandardized B (95% CI)      | Standardized beta |
| <b>1. MVPA</b>                    |                  |                                |                   |          |                                |                   |                                                |                                 |                   |          |                                |                   |
| 1.1 MVPA whole week               | 854              | <b>-0.058 (-0.091, -0.025)</b> | <b>-0.138</b>     | 831      | <b>-0.035 (-0.062, -0.007)</b> | <b>-0.082</b>     | 873                                            | <b>0.044 (0.028, 0.060)</b>     | <b>0.157</b>      | 848      | <b>0.036 (0.021, 0.051)</b>    | <b>0.130</b>      |
| 1.2 MVPA leisure time (weekdays)  | 1000             | <b>-0.072 (-0.106, -0.038)</b> | -0.136            | 971      | <b>-0.062 (-0.089, -0.034)</b> | <b>-0.118</b>     | 1023                                           | <b>0.049 (0.029, 0.068)</b>     | <b>0.137</b>      | 991      | <b>0.043 (0.025, 0.061)</b>    | <b>0.122</b>      |
| 1.3 MVPA leisure time (weekend)   | 866              | -0.017 (-0.038, 0.004)         | -0.053            | 843      | -0.011 (-0.030, 0.010)         | -0.033            | 886                                            | <b>0.030 (0.019, 0.041)</b>     | <b>0.144</b>      | 861      | <b>0.028 (0.017, 0.039)</b>    | <b>0.135</b>      |
| 1.4 MVPA school time              | 1000             | -0.095 (-0.147, -0.043)        | -0.135            | 971      | -0.006 (-0.047, 0.036)         | -0.008            | 1023                                           | <b>0.056 (0.022, 0.090)</b>     | <b>0.117</b>      | 991      | 0.019 (-0.013, 0.052)          | 0.052             |
| <b>2. SED</b>                     |                  |                                |                   |          |                                |                   |                                                |                                 |                   |          |                                |                   |
| 2.1 SED whole week                | 854              | <b>0.009 (0.002, 0.017)</b>    | 0.077             | 831      | 0.011 (-0.004, 0.026)          | 0.089             | 873                                            | <b>-0.009 (-0.016, -0.0002)</b> | <b>-0.113</b>     | 848      | <b>-0.021 (-0.029, -0.012)</b> | <b>-0.261</b>     |
| 2.2 SED bouts (10 min) whole week | 854              | 0.008 (-0.001, 0.017)          | 0.064             | 831      | 0.000 (-0.010, 0.010)          | 0.001             | 873                                            | <b>-0.013 (-0.018, -0.007)</b>  | <b>-0.155</b>     | 848      | <b>-0.011 (-0.016, -0.005)</b> | <b>-0.130</b>     |
| 2.3 SED leisure time (weekdays)   | 1000             | <b>0.009 (0.004, 0.015)</b>    | <b>0.081</b>      | 971      | <b>0.026 (0.011, 0.041)</b>    | <b>0.228</b>      | 1023                                           | -0.005 (-0.009, 0.000)          | -0.063            | 991      | <b>-0.027 (-0.040, -0.015)</b> | <b>-0.358</b>     |
| 2.4 SED leisure time (weekend)    | 866              | -0.003 (-0.009, 0.002)         | -0.036            | 843      | 0.004 (-0.007, 0.015)          | 0.042             | 886                                            | -0.004 (-0.008, 0.001)          | -0.056            | 861      | <b>-0.014 (-0.020, -0.008)</b> | <b>-0.230</b>     |
| 2.5 SED school                    | 1000             | <b>0.024 (0.009, 0.039)</b>    | <b>0.112</b>      | 971      | -0.009 (-0.030, 0.011)         | -0.045            | 1023                                           | <b>-0.013 (-0.025, -0.001)</b>  | <b>-0.091</b>     | 991      | -0.011 (-0.026, 0.004)         | -0.079            |
| <b>3. Organized sports</b>        |                  |                                |                   |          |                                |                   |                                                |                                 |                   |          |                                |                   |
| Did not participate               | 291              | ref                            |                   | 209      | ref                            |                   | 296                                            | ref                             |                   | 213      | ref                            |                   |
| Participated                      | 750              | <b>-1.589 (-2.743, -0.435)</b> |                   | 604      | -0.963 (-2.07, 0.141)          |                   | 766                                            | <b>0.855 (0.036, 1.674)</b>     |                   | 617      | 0.407 (-0.554, 1.367)          |                   |
| <b>4. Screen time weekday</b>     |                  |                                |                   |          |                                |                   |                                                |                                 |                   |          |                                |                   |
| ≤2 hours                          | 343              | ref                            |                   | 329      | ref                            |                   | 348                                            | ref                             |                   | 333      | ref                            |                   |
| 3-4 hours                         | 492              | 0.388 (-0.599, 1.375)          |                   | 483      | 0.407 (-0.481, 1.295)          |                   | 503                                            | <b>-0.827 (-1.529, -0.124)</b>  |                   | 493      | <b>-1.007 (-1.591, -0.423)</b> |                   |
| ≥5 hours                          | 235              | <b>2.626 (1.135, 4.117)</b>    |                   | 226      | <b>2.409 (1.083, 3.735)</b>    |                   | 242                                            | <b>-2.521 (-1.529, -0.125)</b>  |                   | 232      | <b>-2.633 (-3.381, -1.885)</b> |                   |
| <b>5. Screen time weekend</b>     |                  |                                |                   |          |                                |                   |                                                |                                 |                   |          |                                |                   |
| ≤2 hours                          | 169              | ref                            |                   | 159      | ref                            |                   | 174                                            | ref                             |                   | 164      | ref                            |                   |
| 3-4 hours                         | 392              | <b>1.302 (0.132, 2.471)</b>    |                   | 383      | 0.461 (-0.609, 1.531)          |                   | 402                                            | -0.594 (-1.474, 0.286)          |                   | 391      | -0.261 (-1.078, 0.555)         |                   |
| ≥5 hours                          | 507              | <b>2.368 (1.236, 3.501)</b>    |                   | 495      | <b>1.896 (0.881, 2.912)</b>    |                   | 515                                            | <b>-1.607 (-2.582, -0.633)</b>  |                   | 502      | <b>-1.485 (-2.385, -0.585)</b> |                   |

B unstandardized coefficients, beta standardized coefficients, CI confidence interval

MVPA Moderate-to-vigorous physical activity, SED sedentary time, SCAS-S Short version of the Spence Children's Anxiety Scale

The adjusted models have been controlled for gender and parental education. Further, Model 3 were adjusted for time spent in MVPA, and Models 1-3 were adjusted for accelerometer wear-time

**Supplemental material 2.** Crude associations between predictors and anxiety (SCAS-S) and health-related quality of life (Kidsscreen-10) were analyzed with multi-level mixed linear regression models stratified by

1  
2  
3  
4  
5  
6  
7  
8  
9  
10  
11  
12  
13  
14  
15  
16  
17  
18  
19  
20  
21  
22  
23  
24  
25  
26  
27  
28  
29  
30  
31  
32  
33  
34  
35  
36  
37  
38  
39  
40  
41  
42  
43  
44  
45  
46

| gender                            |                  |                                |                   |      |                                |                   |                                                |                                 |                   |      |                                 |                   |
|-----------------------------------|------------------|--------------------------------|-------------------|------|--------------------------------|-------------------|------------------------------------------------|---------------------------------|-------------------|------|---------------------------------|-------------------|
| Model                             | Anxiety (SCAS-S) |                                |                   |      |                                |                   | Health-related quality of life (Kidsscreen-10) |                                 |                   |      |                                 |                   |
|                                   | Girls            |                                |                   | Boys |                                |                   | Girls                                          |                                 |                   | Boys |                                 |                   |
|                                   | n                | Unstandardized B (95% CI)      | Standardized beta | n    | Unstandardized B (95% CI)      | Standardized beta | n                                              | Unstandardized B (95% CI)       | Standardized beta | n    | Unstandardized B (95% CI)       | Standardized beta |
| <b>1. MVPA</b>                    |                  |                                |                   |      |                                |                   |                                                |                                 |                   |      |                                 |                   |
| 1.1 MVPA whole week               | 461              | <b>-0.043 (-0.079, -0.007)</b> | <b>-0.095</b>     | 393  | <b>-0.026 (-0.060, 0.008)</b>  | <b>-0.078</b>     | 473                                            | <b>0.027 (0.004, 0.05)</b>      | <b>0.093</b>      | 400  | <b>0.044 (0.020, 0.069)</b>     | <b>0.171</b>      |
| 1.2 MVPA leisure time (weekdays)  | 517              | <b>-0.096 (-0.139, -0.055)</b> | <b>-0.169</b>     | 483  | <b>-0.037 (-0.067, -0.007)</b> | <b>-0.090</b>     | 531                                            | <b>0.049 (0.023, 0.07)</b>      | <b>0.132</b>      | 492  | <b>0.042 (0.018, 0.067)</b>     | <b>0.130</b>      |
| 1.3 MVPA leisure time (weekend)   | 468              | -0.021 (-0.049, 0.006)         | -0.063            | 398  | -0.003 (-0.025, 0.019)         | -0.011            | 480                                            | 0.021 (-0.001, 0.043)           | 0.095             | 406  | <b>0.036 (0.021, 0.050)</b>     | <b>0.189</b>      |
| 1.4 MVPA school time              | 517              | -0.012 (-0.080, 0.056)         | -0.015            | 483  | 0.004 (-0.047, 0.054)          | 0.007             | 531                                            | 0.003 (-0.042, 0.048)           | 0.005             | 492  | 0.028 (-0.009, 0.066)           | 0.0637            |
| <b>2. SED</b>                     |                  |                                |                   |      |                                |                   |                                                |                                 |                   |      |                                 |                   |
| 2.1 SED whole week                | 461              | 0.000 (-0.008, 0.010)          | 0.004             | 393  | 0.006, (-0.002, 0.014)         | 0.063             | 473                                            | -0.004 (-0.012, 0.003)          | -0.057            | 400  | -0.009 (-0.018, 0.000)          | -0.119            |
| 2.2 SED bouts (10 min) whole week | 461              | -0.002 (-0.014, 0.009)         | -0.017            | 393  | 0.003 (-0.008, 0.014)          | 0.028             | <b>473</b>                                     | <b>-0.010 (-0.016, -0.003)</b>  | <b>-0.122</b>     | 400  | <b>-0.0100 (-0.018, -0.002)</b> | -0.120            |
| 2.3 SED leisure time (weekdays)   | 517              | 0.001 (-0.007, 0.010)          | 0.010             | 483  | 0.008 (0.001, 0.014)           | 0.087             | 531                                            | -0.003 (-0.009, -0.004)         | <b>-0.033</b>     | 492  | -0.004 (-0.010, 0.003)          | -0.052            |
| 2.4 SED leisure time (weekend)    | 468              | -0.003 (-0.011, 0.004)         | -0.033            | 398  | -0.000 (-0.008, 0.008)         | -0.002            | 480                                            | 0.004 (-0.005, 0.006)           | 0.006             | 406  | <b>-0.009 (-0.014, -0.004)</b>  | <b>-0.155</b>     |
| 2.5 SED school                    | 517              | 0.009 (-0.007, 0.025)          | 0.042             | 483  | -0.010 (-0.027, 0.006)         | -0.056            | 531                                            | 0.000 (-0.016, 0.016)           | -0.000            | 492  | -0.005 (-0.020, 0.010)          | -0.034            |
| <b>3. Organized sports</b>        |                  |                                |                   |      |                                |                   |                                                |                                 |                   |      |                                 |                   |
| Did not participate               | 152              | ref                            |                   | 139  | ref                            |                   | 155                                            | ref                             |                   | 141  | ref                             |                   |
| Participated                      | 376              | -0.914 (-2.528, 0.700)         |                   | 374  | <b>-2.009 (-3.445, -0.572)</b> |                   | 386                                            | 0.132 (-1.110, 1.375)           |                   | 380  | 1.358 (0.133, 2.58)             |                   |
| <b>4. Screen time weekday</b>     |                  |                                |                   |      |                                |                   |                                                |                                 |                   |      |                                 |                   |
| ≤2 hours                          | 168              | ref                            |                   | 175  | ref                            |                   | 173                                            | ref                             |                   | 175  | ref                             |                   |
| 3-4 hours                         | 257              | 0.550 (-0.984, 2.084)          |                   | 235  | 0.014 (-1.135, 1.162)          |                   | 261                                            | <b>-1.095 (-19.976, -0.213)</b> |                   | 242  | -0.587 (-1.546, 0.372)          |                   |
| ≥5 hours                          | 120              | <b>3.856 (1.916, 5.796)</b>    |                   | 115  | 1.190 (-0.143, 2.523)          |                   | 126                                            | <b>-3.190 (-4.292, -2.089)</b>  |                   | 116  | <b>-1.609 (-2.845, -0.372)</b>  |                   |
| <b>5. Screen time weekend</b>     |                  |                                |                   |      |                                |                   |                                                |                                 |                   |      |                                 |                   |
| ≤2 hours                          | 546              | ref                            |                   | 104  | ref                            |                   | 69                                             | ref                             |                   | 105  | ref                             |                   |
| 3-4 hours                         | 224              | 1.126 (-1.097, 3.350)          |                   | 168  | -0.163 (-1.719, 1.393)         |                   | 232                                            | -0.903 (-2.388, 0.582)          |                   | 170  | 0.0449 (-1.504, 1.594)          |                   |
| ≥5 hours                          | 257              | <b>2.931 (0.924, 4.938)</b>    |                   | 250  | 0.992 (-0.222, 2.206)          |                   | 260                                            | <b>-2.530 (-4.036, -1.025)</b>  |                   | 255  | -0.615 (-2.100, 0.870)          |                   |

B unstandardized coefficients, beta standardized coefficients, CI confidence interval  
 MVPA Moderate-to-vigorous physical activity, SED sedentary time, SCAS-S Short version of the Spence Children’s Anxiety Scale

**Supplemental material 3.** Unadjusted mean SCAS-S and Kidscreen-10 score and SD for students in the highest and lowest groups of MVPA and screen time

|                          | <b>Anxiety (SCAS-S)</b> |                    |     |                   | <b>Health-related quality of life (Kidscreen-10)</b> |                    |     |                   |
|--------------------------|-------------------------|--------------------|-----|-------------------|------------------------------------------------------|--------------------|-----|-------------------|
|                          | n                       | Girls<br>mean ± SD | n   | Boys<br>mean ± SD | n                                                    | Girls<br>mean ± SD | n   | Boys<br>mean ± SD |
| <b>Screen time</b>       |                         |                    |     |                   |                                                      |                    |     |                   |
| <b>Weekday</b>           |                         |                    |     |                   |                                                      |                    |     |                   |
| ≤2 hours                 | 168                     | 15.46 ±8.37        | 175 | 10.29±6.60        | 173                                                  | 39.62±5.29         | 175 | 41.70±5.22        |
| ≥5 hours                 | 120                     | 19.33±8.24         | 115 | 11.56±7.25        | 126                                                  | 36.40±5.60         | 116 | 39.78±5.78        |
| <b>Weekend</b>           |                         |                    |     |                   |                                                      |                    |     |                   |
| ≤2 hours                 | 65                      | 14.71±7.19         | 104 | 10.04±6.73        | 69                                                   | 39.96±5.34         | 105 | 41.34±5.77        |
| ≥5 hours                 | 257                     | 17.69±8.43         | 250 | 11.21±6.84        | 260                                                  | 37.35±5.19         | 255 | 40.59±5.44        |
| <b>Physical activity</b> |                         |                    |     |                   |                                                      |                    |     |                   |
| MVPA lowest tertile      | 157                     | 17.07±8.77         | 128 | 12.06±7.48        | 160                                                  | 37.83±5.25         | 135 | 39.65±5.94        |
| MVPA highest tertile     | 152                     | 15.65±6.98         | 130 | 9.89±6.32         | 157                                                  | 39.20±4.58         | 130 | 42.32±4.47        |
| <b>Organized sports</b>  |                         |                    |     |                   |                                                      |                    |     |                   |
| Did not participate      | 376                     | 16.31±7.67         | 374 | 10.02±6.28        | 386                                                  | 38.41±5.01         | 380 | 41.41±4.90        |
| Participated             | 152                     | 17.28±8.61         | 139 | 12.06±7.01        | 155                                                  | 38.35±5.59         | 141 | 39.97±5.77        |

MVPA moderate-to-vigorous-physical activity, SED sedentary time, SCAS-S Short version of the Spence Children's Anxiety Scale

**STROBE 2007 (v4) Statement—Checklist of items that should be included in reports of *cross-sectional studies***

| Section/Topic                | Item # | Recommendation                                                                                                                                                                       | Reported on page # |
|------------------------------|--------|--------------------------------------------------------------------------------------------------------------------------------------------------------------------------------------|--------------------|
| <b>Title and abstract</b>    | 1      | (a) Indicate the study’s design with a commonly used term in the title or the abstract                                                                                               | 2                  |
|                              |        | (b) Provide in the abstract an informative and balanced summary of what was done and what was found                                                                                  | 2                  |
| <b>Introduction</b>          |        |                                                                                                                                                                                      |                    |
| Background/rationale         | 2      | Explain the scientific background and rationale for the investigation being reported                                                                                                 | 4                  |
| Objectives                   | 3      | State specific objectives, including any prespecified hypotheses                                                                                                                     | 4                  |
| <b>Methods</b>               |        |                                                                                                                                                                                      |                    |
| Study design                 | 4      | Present key elements of study design early in the paper                                                                                                                              | 4                  |
| Setting                      | 5      | Describe the setting, locations, and relevant dates, including periods of recruitment, exposure, follow-up, and data collection                                                      | 4                  |
| Participants                 | 6      | (a) Give the eligibility criteria, and the sources and methods of selection of participants                                                                                          | 4                  |
| Variables                    | 7      | Clearly define all outcomes, exposures, predictors, potential confounders, and effect modifiers. Give diagnostic criteria, if applicable                                             | 5-6                |
| Data sources/<br>measurement | 8*     | For each variable of interest, give sources of data and details of methods of assessment (measurement). Describe comparability of assessment methods if there is more than one group | 5-6                |
| Bias                         | 9      | Describe any efforts to address potential sources of bias                                                                                                                            | 5-6                |
| Study size                   | 10     | Explain how the study size was arrived at                                                                                                                                            | 4                  |
| Quantitative variables       | 11     | Explain how quantitative variables were handled in the analyses. If applicable, describe which groupings were chosen and why                                                         | 5-6                |
| Statistical methods          | 12     | (a) Describe all statistical methods, including those used to control for confounding                                                                                                | 6                  |
|                              |        | (b) Describe any methods used to examine subgroups and interactions                                                                                                                  | 6                  |
|                              |        | (c) Explain how missing data were addressed                                                                                                                                          | 6                  |
|                              |        | (d) If applicable, describe analytical methods taking account of sampling strategy                                                                                                   | n/a                |
|                              |        | (e) Describe any sensitivity analyses                                                                                                                                                | 6                  |
| <b>Results</b>               |        |                                                                                                                                                                                      |                    |

|                          |     |                                                                                                                                                                                                              |                                                       |
|--------------------------|-----|--------------------------------------------------------------------------------------------------------------------------------------------------------------------------------------------------------------|-------------------------------------------------------|
| Participants             | 13* | (a) Report numbers of individuals at each stage of study—eg numbers potentially eligible, examined for eligibility, confirmed eligible, included in the study, completing follow-up, and analysed            | 4-7                                                   |
|                          |     | (b) Give reasons for non-participation at each stage                                                                                                                                                         | 4                                                     |
|                          |     | (c) Consider use of a flow diagram                                                                                                                                                                           | 4                                                     |
| Descriptive data         | 14* | (a) Give characteristics of study participants (eg demographic, clinical, social) and information on exposures and potential confounders                                                                     | 7                                                     |
|                          |     | (b) Indicate number of participants with missing data for each variable of interest                                                                                                                          | 7                                                     |
| Outcome data             | 15* | Report numbers of outcome events or summary measures                                                                                                                                                         | 7                                                     |
| Main results             | 16  | (a) Give unadjusted estimates and, if applicable, confounder-adjusted estimates and their precision (eg, 95% confidence interval). Make clear which confounders were adjusted for and why they were included | 6-8, and in the supplemental material (table 1 and 2) |
|                          |     | (b) Report category boundaries when continuous variables were categorized                                                                                                                                    | 5-6                                                   |
|                          |     | (c) If relevant, consider translating estimates of relative risk into absolute risk for a meaningful time period                                                                                             | n/a                                                   |
| Other analyses           | 17  | Report other analyses done—eg analyses of subgroups and interactions, and sensitivity analyses                                                                                                               | 6-9                                                   |
| <b>Discussion</b>        |     |                                                                                                                                                                                                              |                                                       |
| Key results              | 18  | Summarise key results with reference to study objectives                                                                                                                                                     | 10                                                    |
| Limitations              | 19  | Discuss limitations of the study, taking into account sources of potential bias or imprecision. Discuss both direction and magnitude of any potential bias.                                                  | 10-11                                                 |
| Interpretation           | 20  | Give a cautious overall interpretation of results considering objectives, limitations, multiplicity of analyses, results from similar studies, and other relevant evidence                                   | 10-11                                                 |
| Generalisability         | 21  | Discuss the generalisability (external validity) of the study results                                                                                                                                        | 10                                                    |
| <b>Other information</b> |     |                                                                                                                                                                                                              |                                                       |
| Funding                  | 22  | Give the source of funding and the role of the funders for the present study and, if applicable, for the original study on which the present article is based                                                | 12                                                    |

\*Give information separately for cases and controls in case-control studies and, if applicable, for exposed and unexposed groups in cohort and cross-sectional studies.

**Note:** An Explanation and Elaboration article discusses each checklist item and gives methodological background and published examples of transparent reporting. The STROBE checklist is best used in conjunction with this article (freely available on the Web sites of PLoS Medicine at <http://www.plosmedicine.org/>, Annals of Internal Medicine at <http://www.annals.org/>, and Epidemiology at <http://www.epidem.com/>). Information on the STROBE Initiative is available at [www.strobe-statement.org](http://www.strobe-statement.org).



# BMJ Open

## Cross-sectional associations between physical activity pattern, sports participation, screen time and mental health in Swedish adolescents

|                                 |                                                                                                                                                                                                                                                                                                                                                                                                                                                                                                                                                                                                             |
|---------------------------------|-------------------------------------------------------------------------------------------------------------------------------------------------------------------------------------------------------------------------------------------------------------------------------------------------------------------------------------------------------------------------------------------------------------------------------------------------------------------------------------------------------------------------------------------------------------------------------------------------------------|
| Journal:                        | <i>BMJ Open</i>                                                                                                                                                                                                                                                                                                                                                                                                                                                                                                                                                                                             |
| Manuscript ID                   | bmjopen-2022-061929.R1                                                                                                                                                                                                                                                                                                                                                                                                                                                                                                                                                                                      |
| Article Type:                   | Original research                                                                                                                                                                                                                                                                                                                                                                                                                                                                                                                                                                                           |
| Date Submitted by the Author:   | 28-Jun-2022                                                                                                                                                                                                                                                                                                                                                                                                                                                                                                                                                                                                 |
| Complete List of Authors:       | Kjellenberg, Karin; Swedish School of Sport and Health Sciences GIH, Physical Activity and Health<br>Ekblom, Orjan; Swedish School of Sport and Health Sciences GIH, Physical Activity and Health<br>Ahlen, Johan; Karolinska Institutet, Department of Public Health Sciences<br>Helgadóttir, Björg; Swedish School of Sport and Health Sciences GIH, Physical Activity and Health; Karolinska Institutet, Department of Clinical Neuroscience<br>Nyberg, Gisela; Swedish School of Sport and Health Sciences GIH, Physical Activity and Health; Karolinska Institutet, Department of Global Public Health |
| <b>Primary Subject Heading</b>: | Mental health                                                                                                                                                                                                                                                                                                                                                                                                                                                                                                                                                                                               |
| Secondary Subject Heading:      | Paediatrics, Sports and exercise medicine, Public health                                                                                                                                                                                                                                                                                                                                                                                                                                                                                                                                                    |
| Keywords:                       | Child & adolescent psychiatry < PSYCHIATRY, PUBLIC HEALTH, Community child health < PAEDIATRICS, Anxiety disorders < PSYCHIATRY, MENTAL HEALTH                                                                                                                                                                                                                                                                                                                                                                                                                                                              |
|                                 |                                                                                                                                                                                                                                                                                                                                                                                                                                                                                                                                                                                                             |

SCHOLARONE™  
Manuscripts



I, the Submitting Author has the right to grant and does grant on behalf of all authors of the Work (as defined in the below author licence), an exclusive licence and/or a non-exclusive licence for contributions from authors who are: i) UK Crown employees; ii) where BMJ has agreed a CC-BY licence shall apply, and/or iii) in accordance with the terms applicable for US Federal Government officers or employees acting as part of their official duties; on a worldwide, perpetual, irrevocable, royalty-free basis to BMJ Publishing Group Ltd ("BMJ") its licensees and where the relevant Journal is co-owned by BMJ to the co-owners of the Journal, to publish the Work in this journal and any other BMJ products and to exploit all rights, as set out in our [licence](#).

The Submitting Author accepts and understands that any supply made under these terms is made by BMJ to the Submitting Author unless you are acting as an employee on behalf of your employer or a postgraduate student of an affiliated institution which is paying any applicable article publishing charge ("APC") for Open Access articles. Where the Submitting Author wishes to make the Work available on an Open Access basis (and intends to pay the relevant APC), the terms of reuse of such Open Access shall be governed by a Creative Commons licence – details of these licences and which [Creative Commons](#) licence will apply to this Work are set out in our licence referred to above.

Other than as permitted in any relevant BMJ Author's Self Archiving Policies, I confirm this Work has not been accepted for publication elsewhere, is not being considered for publication elsewhere and does not duplicate material already published. I confirm all authors consent to publication of this Work and authorise the granting of this licence.

## Manuscript

### Title

Cross-sectional associations between physical activity pattern, sports participation, screen time and mental health in Swedish adolescents

### Authors

Kjellenberg K<sup>1\*</sup>, Ekblom Ö<sup>1</sup>, Ahlen J<sup>2</sup>, Helgadóttir B<sup>1,3</sup>, and Nyberg G<sup>1,2</sup>,

### Affiliations

<sup>1</sup> Department of Physical Activity and Health, The Swedish School of Sport and Health Sciences (GIH), Stockholm, Sweden

<sup>2</sup> Department of Global Public Health, Karolinska Institutet, Stockholm, Sweden

<sup>3</sup> Department of Clinical Neuroscience, Karolinska Institutet, Stockholm, Sweden

1. Karin Kjellenberg; MSc, Doctoral student, Department of Physical Activity and Health, The Swedish School of Sport and Health Sciences, Stockholm, Sweden
2. Örjan Ekblom, Ph.D., Professor, Department of Physical Activity and Health, The Swedish School of Sport and Health Sciences, Stockholm, Sweden
3. Johan Ahlen, Ph.D., Department of Global Public Health, Karolinska Institutet, Stockholm, Sweden
4. Björg Helgadóttir, Ph.D., Project Researcher, Department of Physical Activity and Health, The Swedish School of Sport and Health Sciences, Stockholm, Sweden; Department of Clinical Neuroscience Karolinska Institutet, Stockholm, Sweden
5. Gisela Nyberg, Ph.D., Associate Professor, Department of Physical Activity and Health, The Swedish School of Sport and Health Sciences, Stockholm, Sweden; Department of Global Public Health, Karolinska Institutet, Stockholm, Sweden

### \*Corresponding author

Name Karin Kjellenberg  
Department Physical Activity and Health  
Institution The Swedish School of Sport and Health Sciences (GIH)  
Postal address Box 5626, 114 33 Stockholm, Sweden  
Country Sweden  
Tel + 46 8 120 53 811  
Email [karin.kjellenberg@gih.se](mailto:karin.kjellenberg@gih.se)

**Word count:** 4463

## ABSTRACT

**Objectives:** To investigate the associations between physical activity pattern, sports participation, screen time, and mental health in Swedish adolescents

**Design, setting, and participants:** A total of 1139 Swedish adolescents (mean age 13.4) from 34 schools participated in the cross-sectional study “Physical Activity for Healthy Brain Functions in School Youth” in 2019.

**Methods:** Time spent sedentary and in moderate-to-vigorous-physical activity (MVPA) was measured using accelerometers for seven consecutive days. Screen time and sports participation were self-reported. Anxiety and health-related quality of life (HRQoL) were assessed using a short version of the Spence Children’s Anxiety Scale and Kidscreen-10.

**Results:** MVPA was positively associated (CI: 0.01, 0.05 in girls and 0.02, 0.07 in boys) whereas screen time on weekdays was inversely associated with HRQoL (-4.79, -2.22 in girls and -2.66, -0.41 in boys). The largest effect sizes were observed between the high/low MVPA group in boys (Cohen’s  $d=0.51$ ) and screen time groups in girls (Cohen’s  $d=0.59$  on weekdays). With regards to anxiety, high compared to lower time spent in MVPA during leisure time on weekdays was associated with lower anxiety scores (CI: -0.13, -0.05 in girls and -0.07, -0.01 in boys). Gender differences were observed, boys who participated in organized sports had low anxiety scores (CI: -3.49, -0.13) whereas girls who reported five hours or more of screen time had high scores (CI: 1.94, 6.18 on weekdays and 1.39, 5.29 on weekend days).

**Conclusions:** This study showed that MVPA was associated with better mental health, whereas the opposite was seen for screen time. These associations were not consistently significant throughout all time domains, between the genders and mental health outcomes. Our results could create a paradigm for future studies to decide which types of PA patterns and time domains to target in intervention studies with the aim improve mental health among adolescents.

**Keywords:** Adolescent, Physical Activity, Sedentary Behavior, Screen time, Accelerometry, Screen time, Mental health, Anxiety, Health-related quality of life, Kidscreen

## STRENGTHS AND LIMITATIONS OF THIS STUDY

- Physical activity and sedentary time were assessed using accelerometers.
- The study included both a positive and negative indicators of mental health.
- Due to the cross-sectional design causation or the direction of these associations cannot be studied.

## INTRODUCTION

The World Health Organization describes health as “a state of complete physical, mental and social well-being and not merely the absence of disease or infirmity” [1]. Thus, mental health is an important component of health and includes both positive indicators (e.g. well-being) and negative indicators (e.g. psychiatric symptoms). Poor mental health among youth is a global public health concern with major consequences for both individuals and society [2]. Mental disorders at an early age have been associated with stigma, decreased academic achievements, increased risk of physical disorders in adulthood, and premature death [3]. The age of onset for approximately half of the mental disorders occurs before or during adolescence [4], with anxiety being the most common mental disorder with a prevalence of 6.5% [5]. Therefore, it is important to investigate how modifiable lifestyle factors are associated with mental health in this population.

Physical activity (PA) has been found to be a protective factor for emotional problems [6] and high levels of PA have cross-sectionally been associated with better mental health outcomes [7-10]. Studies have also shown a lower prevalence of depressive symptoms in those engaging in organized sports compared to those being active on their own [11, 12], suggesting that the context of activity could be important. However, the majority of adolescents do not meet the PA recommendations of 60 minutes of moderate-to-vigorous-physical activity (MVPA) per day [13]. A study in Swedish adolescents (11-18-year-olds) found that only 23% of girls and 43% of boys met the recommendations [14]. In addition, sedentary behaviors, especially screen time have been associated with poor mental health [15, 16].

Although these associations have been studied before, most studies rely on self-reported PA [10], which has shown to have low validity in this population [17]. A more robust measure is device-measured PA that provides a more detailed estimate of PA and SED. There is also a lack of studies that include both positive and negative indicators of mental health, with a tendency to focus on mental health disorders or symptoms. In this study, we chose health-related quality of life as a positive indicator and anxiety as a negative indicator. Anxiety (rather than depression) was selected as it is the most common psychiatric problem in this age group (13-14 years), and because anxiety tends to have an earlier mean age of onset compared to for example depression, which typically has an onset in late adolescence.

The objective of the study was therefore to examine cross-sectional associations between device-measured PA patterns (MVPA, SED), sports participation, screen time, and mental health (anxiety and health-related quality of life) in Swedish adolescents.

## METHODS

### Sample

This study is part of the larger cross-sectional study Physical Activity for Healthy Brain Functions in School Youth performed between September–December 2019. A sample size of 1000 students was estimated to provide a representative sample of students from schools with varying sizes, geographic locations, and parental socio-economic backgrounds. The Swedish school system is deregulated and has implemented the free choice reform which allows parents to choose which schools (independent and public) their children should attend. The schools follow a voucher system and the parents do not have to pay tuition fees [18]. In the current study, 11 (32%) were independent schools and 23 (68%) were public schools. Figure 1 shows an overview of the participating schools and students. A total of 34 schools participated, the provided reasons for the schools that declined or dropped out were time constraints. From these schools, 1139 students participated (73% response rate), 49% boys and 51% girls, the recruitment process is described in more detail elsewhere [19]. The characteristics of the students are shown in Table 1. The study had ethical approval by the Swedish Ethical Review Authority (DNR: 2019-03579) and was conducted by the Declaration of Helsinki. As the participants were minors, all participants and their parents provided written informed consent.

1  
2  
3  
4  
5 The students participated in the measurements at the Swedish School of Sport and Health Sciences,  
6 GIH, and during the visit, they were provided with an accelerometer, which they used for the  
7 following seven days. The students received a 300 SEK (€ 30) gift card as compensation for their  
8 participation.  
9

10 **[Figure 1 should be inserted here]**  
11  
12

### 13 **Patient and Public Involvement**

14 The students were not involved in the design, conduct, reporting, or dissemination plans of our  
15 research however, the participating schools, students, and their parents received a summary of the  
16 results from the study.  
17

### 18 **Measures**

#### 19 **Mental health**

20 Health-related quality of life (HRQoL) was assessed using Kidscreen-10. The scale includes 10 items  
21 of how often the students have felt during the last week, for example, 'sad', 'lonely' or 'fit and well'.  
22 The answers range from never/not at all to always/extremely on a five-point scale. The scores are  
23 summed up with higher values indicating greater wellbeing. To compare these values to a reference  
24 population, Rasch person-parameters can be estimated by transforming the data into a T-score with a  
25 mean of 50 and SD of 10 using the provided syntax from the Kidscreen group [20].  
26

27  
28 Anxiety was measured using a short version of the Spence Children's Anxiety Scale (SCAS-S), a tool  
29 used to assess self-reported anxiety symptoms in children and adolescents. The questionnaire includes  
30 19 items for example "I worry about things". Each item is rated on a four-point scale ranging from  
31 'never' to 'always'. The scores are summed up with higher values reflecting more anxiety symptoms  
32 [21]. The cut-off for elevated anxiety symptoms was set at 1 SD above the mean and the cut-off for  
33 high anxiety symptoms was set at 1.5 SD above the mean with separate cut-offs for girls and boys  
34 respectively.  
35

36 These two measures have been validated towards the longer versions and provide a global score for  
37 anxiety/HRQoL rather than a subscore for each domain of HRQoL or cluster of anxiety symptoms [20,  
38 21].  
39

#### 40 **Physical activity patterns and screen time**

41 Physical activity patterns (time spent in MVPA and SED) were measured using a hip-worn  
42 accelerometer (Actigraph GT3X). The students were told to wear the monitor at all waken times for  
43 the next seven consecutive days (not counting the distribution day), except during water-based  
44 activities. Afterward, the monitors were sent back by the teachers in pre-paid envelopes. Acceleration  
45 was measured at 30 Hz. The accelerometer data were processed in Actilife (v6.13.3) as uniaxial data  
46 using epoch time intervals of 5 seconds. To define non-wear time, 60 minutes of zero counts and no  
47 spike tolerance was used. Further, an individual time filter was created based on the participant's  
48 reported wake/sleep time (extracted from the questionnaire). A second time filter for school time was  
49 created by extracting the times from the school schedules. The criteria for a valid day were at least 500  
50 minutes of wear time. The criteria for a valid measure were at least three valid days (including one  
51 weekend day) for analysis of the whole week, at least two valid weekdays for analysis of school-time  
52 or weekday leisure time, and at least one valid weekend day for analysis of weekends. The data were  
53 categorized into intensities using counts: SED (0-100 counts/minute) and MVPA ( $\geq 2296$   
54 counts/minute) [22]. The first day was excluded to minimize measurement bias [17].  
55  
56

57 Participation in organized sports was self-reported by the students using the following question "Are  
58 you active in any sports club/organization? (e.g., football, swimming, dancing, scouts, gym)?"  
59  
60

1  
2  
3  
4  
5 Screen time was self-reported by the students using the following question for weekdays and  
6 weekends. “During a normal weekday/weekend day, approximately how much time do you spend  
7 using a screen (not included schoolwork) including a cell phone, TV, computer, iPad? (For example,  
8 to play games, watch TV, chat, watch serials, YouTube, Snapchat, and Instagram)”. The answers were  
9 arranged from no time to 7 hours or more, and were later categorized into two hours and below, three  
10 to four hours, and five hours or above.  
11

### 12 **Covariates**

13 Based on previous studies, parental education, and body mass index standard deviation score (BMIsd,  
14 i.e., BMI adjusted for age and gender) were tested as confounders.  
15

16 Parental education was collected using register data from Statistics Sweden. The parent with the  
17 highest level of education was used and the variable was dichotomized into  $\leq 12$  years and  $> 12$  years.  
18 Information about school type (independent or public) were collected from the National Agency for  
19 Education. Gender was self-reported by the student. As the gender group, “other” only included one  
20 student, this observation was excluded in the models stratified by gender. Bodyweight and height were  
21 measured using standardized procedures and rounded to the closest 0.1 kilograms or millimeter. BMI  
22 status was defined according to the International Obesity Task Force [23] and BMIsds was calculated  
23 according to a Swedish reference standard [24].  
24

### 25 **Statistical analysis**

26 Data were analyzed using STATA/SE version 17.0. Descriptive statistics are presented using mean,  
27 standard deviation, and proportions. To compare the difference between boys and girls independent t-  
28 tests were used for numerical variables and chi-square for categorical variables. To investigate the  
29 associations between PA patterns, sports participation screen time (as predictors), and mental health  
30 (as dependent variables) multi-level mixed linear regression models were used to account for the  
31 clustering of students within schools. Two levels were modelled, level 1 for school and level 2 for the  
32 individual student, and a random intercept for each school was applied. We explored both  
33 unstandardized and standardized beta-coefficients for the continuous predictors. The assumptions for  
34 mixed models were tested, and as data displayed heteroskedasticity (Breusch-Pagan test  $p > 0.05$ )  
35 robust estimates were used. All models were adjusted for parental education and accelerometer wear-  
36 time. The models with sports participation were additionally adjusted for time spent in MVPA. As  
37 BMIsds were not significant in any of the models, this covariate was excluded from the final models.  
38 Only students with complete data on the mental health scales were included in the analyzes. All  
39 models were stratified by gender as the PA and mental health outcomes were significantly different  
40 between boys and girls. However, we also explored if gender moderated the associations by running  
41 the same models with all subjects and adding an interaction term. Only significant interaction results  
42 are presented in the text. Crude models are included in Tables 1-2 in the supplemental material.  
43  
44

45 To analyze the effect size in SCAS-S and Kidscreen-10, standardized mean differences (Cohen’s d)  
46 were calculated between the low/high tertiles of MVPA, screen time, and participants/ non-  
47 participants in organized sports. The level of statistical significance was set at  $\alpha < 0.05$ , 95%  
48 confidence intervals, and p-values and beta values are bolded to indicate statistical significance.  
49

### 50 **RESULTS**

51 In total, 1072 students (94%) completed all items on SCAS-S. Girls reported significantly higher  
52 anxiety scores compared to boys (16.6 vs. 10.6, mean difference of 6.0,  $t(1070) = 13.44$   $p < 0.01$ ). In  
53 girls, 82 (15%) had a score  $> 1$  SD above the mean (elevated anxiety) and 50 (9%) had a score  $> 1.5$   
54 SD above the mean (high anxiety). In boys, the corresponding values were 75 (14%) students and 42  
55 (8%) students. Boys to parents with low education had significantly higher anxiety symptoms (mean  
56 difference 1.6  $t(505) = 2.7$   $p < 0.01$ ) compared to boys with high parental education. This difference was  
57 not observed in girls or for HRQoL.  
58  
59  
60

1  
2  
3  
4  
5 A total of 1096 (96%) students completed all items on the Kidscreen-10 questionnaire where girls  
6 had significantly lower scores of HRQoL (mean difference of 2.63,  $t(1094) = -8.29$   $p < 0.01$ ) compared  
7 to boys. The Cronbach alpha for Kidscreen-10 was 0.78 and 0.84 for SCAS-S, indicating acceptable  
8 to good internal consistency.

9 For the PA measurements, 903 students (79%) had valid accelerometer readings for the whole  
10 week, 1054 students (93%) for weekdays, and 916 (80%) on weekends. There were no significant  
11 differences in mean values of SCAS-S or Kidscreen-10 between those who had a valid accelerometer  
12 reading and those who did not.  
13  
14  
15  
16  
17  
18  
19  
20  
21  
22  
23  
24  
25  
26  
27  
28  
29  
30  
31  
32  
33  
34  
35  
36  
37  
38  
39  
40  
41  
42  
43  
44  
45  
46  
47  
48  
49  
50  
51  
52  
53  
54  
55  
56  
57  
58  
59  
60

For peer review only



**Table 1.** Descriptive characteristics of the study sample by gender (mean  $\pm$  SD unless otherwise specified)

|                                        | n    | missing | All              | n   | Girls             | n   | Boys             | Sig.<br>p        |
|----------------------------------------|------|---------|------------------|-----|-------------------|-----|------------------|------------------|
| <b>Total</b>                           |      |         | 1139 (100)       |     | 580 (51.0)        |     | 558 (49.0)       |                  |
| Age (year)                             | 1139 | 0       | 13.4 $\pm$ 0.3   |     | 13.4 $\pm$ 0.3    |     | 13.4 $\pm$ 0.4   | 0.147            |
| Parental education, >12 years n (%)    | 1102 | 37      | 730 (66.2)       |     | 371 (65.9)        |     | 358 (66.5)       | 0.821            |
| Student country of birth, Sweden n (%) | 1129 | 10      | 967 (85.7)       |     | 490 (84.9)        |     | 476 (86.4)       | 0.758            |
| <b>BMI status<sup>1</sup></b>          | 1134 | 5       |                  | 580 |                   | 554 |                  | 0.203            |
| Underweight n (%)                      |      |         | 89 (7.8)         |     | 38 (6.6)          |     | 51 (9.2)         |                  |
| Normal weight n (%)                    |      |         | 815 (71.8)       |     | 430 (74.1)        |     | 384 (69.3)       |                  |
| Overweight n (%)                       |      |         | 179 (15.8)       |     | 89 (15.3)         |     | 90 (16.2)        |                  |
| Obese n (%)                            |      |         | 52 (4.6)         |     | 23 (4.0)          |     | 29 (5.2)         |                  |
| <b>BMI sds<sup>2</sup></b>             | 1134 | 5       | 0.36 $\pm$ 1.23  | 580 | 0.45 $\pm$ 1.11   | 554 | 0.26 $\pm$ 1.35  | <b>0.012</b>     |
| <b>Sedentary time (min)</b>            |      |         |                  |     |                   |     |                  |                  |
| SED (average week)                     | 903  | 236     | 602.0 $\pm$ 66.6 | 490 | 608.9 $\pm$ 62.65 | 413 | 593.7 $\pm$ 70.2 | <b>&lt;0.001</b> |
| SED bouts over 10 min                  | 903  | 236     | 122.7 $\pm$ 63.6 | 490 | 132.8 $\pm$ 63.2  | 413 | 110.7 $\pm$ 62.2 | <b>&lt;0.001</b> |
| SED leisure time (weekdays)            | 1054 | 85      | 324.8 $\pm$ 69.2 | 548 | 330.0 $\pm$ 63.5  | 506 | 319.2 $\pm$ 74.7 | <b>0.011</b>     |
| SED leisure time (weekend)             | 916  | 223     | 539.4 $\pm$ 84.7 | 497 | 533.8 $\pm$ 80.0  | 419 | 546.1 $\pm$ 89.6 | <b>0.029</b>     |
| SED school time                        | 1054 | 85      | 291.9 $\pm$ 37.5 | 548 | 301.7 $\pm$ 35.7  | 506 | 281.2 $\pm$ 36.5 | <b>&lt;0.001</b> |
| <b>MVPA time (min)</b>                 |      |         |                  |     |                   |     |                  |                  |
| MVPA (average week)                    | 903  | 236     | 52.0 $\pm$ 19.0  | 490 | 49.52 $\pm$ 17.7  | 413 | 54.86 $\pm$ 20.1 | <b>&lt;0.001</b> |
| MVPA leisure time (weekdays)           | 1054 | 85      | 31.6 $\pm$ 15.0  | 548 | 30.9 $\pm$ 13.8   | 506 | 32.3 $\pm$ 16.1  | 0.145            |
| MVPA leisure time (weekend)            | 916  | 223     | 37.9 $\pm$ 25.3  | 497 | 36.8 $\pm$ 23.3   | 419 | 39.1 $\pm$ 27.4  | 0.156            |
| MVPA school time                       | 1054 | 85      | 26.5 $\pm$ 11.2  | 548 | 23.2 $\pm$ 9.6    | 506 | 30.1 $\pm$ 11.7  | <b>&lt;0.001</b> |
| Reached the MVPA recommendations n (%) | 903  | 236     | 273 (30.2)       | 490 | 121 (24.7)        | 413 | 152 (36.8)       | <b>&lt;0.001</b> |
| <b>Accelerometer wear time</b>         | 903  | 236     |                  | 490 |                   | 413 |                  |                  |
| Wear time (average week)               |      |         | 792.6 $\pm$ 60.8 |     | 796.0 $\pm$ 58.1  |     | 788.5 $\pm$ 63.8 | 0.067            |
| Total included valid days              |      |         | 6.0 $\pm$ 1.1    |     | 6.2 $\pm$ 1.0     |     | 5.8 $\pm$ 1.1    | <b>&lt;0.001</b> |
| <b>Organized sports</b>                |      |         |                  |     |                   |     |                  |                  |
| Participated in organized sports n (%) |      |         | 787 (72.0)       |     | 396 (71.4)        |     | 391 (72.7)       | 0.626            |
| <b>Screen time (weekdays)</b>          | 1125 | 14      |                  | 575 |                   | 550 |                  | 0.842            |
| $\leq$ 2 hours n (%)                   |      |         | 359 (32.0)       |     | 179 (31.1)        |     | 180 (32.7)       |                  |
| 3-4 hours n (%)                        |      |         | 515 (46.0)       |     | 267 (46.4)        |     | 248 (45.1)       |                  |
| $\geq$ 5 hours n (%)                   |      |         | 251 (22.3)       |     | 129 (22.4)        |     | 122 (22.2)       |                  |
| <b>Screen time (weekend)</b>           | 1122 | 17      |                  | 576 |                   | 546 |                  | <b>&lt;0.001</b> |
| $\leq$ 2 hours n (%)                   |      |         | 178 (15.9)       |     | 70 (12.2)         |     | 108 (19.8)       |                  |
| 3-4 hours n (%)                        |      |         | 411 (36.6)       |     | 238 (41.3)        |     | 173 (31.7)       |                  |
| $\geq$ 5 hours n (%)                   |      |         | 533 (47.5)       |     | 268 (46.6)        |     | 265 (48.5)       |                  |
| <b>Mental health</b>                   |      |         |                  |     |                   |     |                  |                  |
| SCAS-S                                 | 1072 | 67      | 13.7 $\pm$ 7.9   | 547 | 16.6 $\pm$ 8.0    | 525 | 10.6 $\pm$ 6.6   | <b>&lt;0.001</b> |
| Kidscreen-10                           | 1096 | 43      | 39.6 $\pm$ 5.4   | 562 | 38.3 $\pm$ 5.2    | 534 | 41.0 $\pm$ 5.3   | <b>&lt;0.001</b> |
| Kidscreen-10 <sup>T</sup>              | 1096 | 43      | 49.6 $\pm$ 9.0   | 562 | 47.3 $\pm$ 7.5    | 534 | 51.9 $\pm$ 9.8   | <b>&lt;0.001</b> |

<sup>1</sup>BMI status according to IOTF 2012, <sup>2</sup> BMI sds according to a Swedish reference standard.

MVPA moderate-to-vigorous physical activity, SED sedentary time, SCAS-S Short version of the Spence Children's Anxiety Scale,

<sup>T</sup>international T-values based on Rasch person parameter

On an average day, boys spent significantly more in MVPA. However, when breaking down the MVPA between domains, this difference was only significant during school time (mean difference of 6.9 min,  $t(1052) = -10.56$   $p < 0.01$ ). Students who participated in organized sports had 11.3 more minutes per day in MVPA compared to those who did not participate  $t(874) = -8.10$   $p < 0.01$ . Similarly, the group who reported low screen time ( $\leq 2$  hours) on weekends spent 15 more minutes in MVPA compared to those who reported five hours or more  $t(568) = 6.32$   $p < 0.01$ . Table 2 shows the associations between anxiety (SCAS-S) and health-related quality of life (Kidscreen-10) and predictors using multi-level mixed linear regression models.

**Table 2.** Associations between predictors and anxiety (SCAS-S) and health-related quality of life (Kidsscreen-10) were analyzed with multi-level mixed linear regression models stratified by gender

| Model                             | Anxiety (SCAS-S) |                                |                   |      |                                |                   | Health-related quality of life (Kidsscreen-10) |                                |                   |      |                                |                   |
|-----------------------------------|------------------|--------------------------------|-------------------|------|--------------------------------|-------------------|------------------------------------------------|--------------------------------|-------------------|------|--------------------------------|-------------------|
|                                   | Girls            |                                |                   | Boys |                                |                   | Girls                                          |                                |                   | Boys |                                |                   |
|                                   | n                | Unstandardized B (95% CI)      | Standardized beta | n    | Unstandardized B (95% CI)      | Standardized beta | n                                              | Unstandardized B (95% CI)      | Standardized beta | n    | Unstandardized B (95% CI)      | Standardized beta |
| <b>1. MVPA</b>                    |                  |                                |                   |      |                                |                   |                                                |                                |                   |      |                                |                   |
| 1.1 MVPA whole week               | 448              | <b>-0.045 (-0.079, -0.011)</b> | <b>-0.099</b>     | 383  | -0.026 (-0.058, 0.007)         | -0.077            | 458                                            | <b>0.032 (0.009, 0.054)</b>    | <b>0.110</b>      | 390  | <b>0.040 (0.015, 0.065)</b>    | <b>0.157</b>      |
| 1.2 MVPA leisure time (weekdays)  | 503              | <b>-0.091 (-0.134, -0.049)</b> | <b>-0.161</b>     | 468  | <b>-0.038 (-0.066, -0.010)</b> | <b>-0.095</b>     | 514                                            | <b>0.048 (0.023, 0.073)</b>    | <b>0.130</b>      | 477  | <b>0.036 (0.011, 0.061)</b>    | <b>0.100</b>      |
| 1.3 MVPA leisure time (weekend)   | 455              | -0.023 (-0.049, 0.002)         | -0.067            | 388  | -0.001 (-0.024, 0.021)         | -0.005            | 465                                            | <b>0.023 (0.033, 0.043)</b>    | <b>0.105</b>      | 396  | <b>0.034 (0.020, 0.048)</b>    | <b>0.183</b>      |
| 1.4 MVPA school time              | 503              | -0.027 (-0.100, 0.047)         | -0.032            | 468  | 0.015 (-0.039, 0.069)          | 0.027             | 514                                            | 0.013 (-0.033, 0.059)          | 0.025             | 477  | 0.020 (-0.024, 0.064)          | 0.046             |
| <b>2. SED</b>                     |                  |                                |                   |      |                                |                   |                                                |                                |                   |      |                                |                   |
| 2.1 SED whole week                | 448              | 0.011 (-0.007, 0.028)          | 0.081             | 383  | 0.011 (-0.006, 0.028)          | 0.114             | 458                                            | <b>-0.021 (-0.032, -0.009)</b> | <b>-0.251</b>     | 390  | <b>-0.021 (-0.033, -0.008)</b> | <b>-0.285</b>     |
| 2.2 SED bouts (10 min) whole week | 448              | -0.001 (-0.014, 0.012)         | -0.009            | 383  | 0.002 (-0.009, 0.013)          | 0.021             | 458                                            | <b>-0.012 (-0.020, -0.005)</b> | <b>-0.150</b>     | 390  | <b>-0.009 (-0.017, -0.001)</b> | <b>-0.113</b>     |
| 2.3 SED leisure time (weekdays)   | 503              | <b>0.040 (0.017, 0.062)</b>    | <b>0.315</b>      | 468  | 0.017 (-0.002, 0.036)          | 0.195             | 514                                            | <b>-0.034 (-0.051, -0.017)</b> | <b>-0.421</b>     | 477  | <b>-0.020 (-0.036, -0.005)</b> | <b>-0.299</b>     |
| 2.4 SED leisure time (weekend)    | 455              | 0.007 (-0.006, 0.020)          | 0.064             | 388  | 0.003 (-0.009, 0.014)          | 0.035             | 465                                            | <b>-0.013 (-0.022, -0.003)</b> | <b>-0.192</b>     | 396  | <b>-0.017 (-0.025, -0.009)</b> | <b>-0.299</b>     |
| 2.5 SED school                    | 503              | -0.009 (-0.039, 0.021)         | -0.041            | 468  | -0.011 (-0.034, 0.012)         | -0.062            | 514                                            | -0.001 (-0.026, 0.001)         | -0.060            | 477  | -0.012 (-0.033, 0.001)         | -0.083            |
| <b>3. Organized sports</b>        |                  |                                |                   |      |                                |                   |                                                |                                |                   |      |                                |                   |
| Did not participate               | 112              | ref                            |                   | 97   | ref                            |                   | 114                                            | ref                            |                   | 99   | ref                            |                   |
| Participated                      | 321              | -0.210 (-2.165, 1.745)         |                   | 283  | <b>-1.810 (-3.492, -0.129)</b> |                   | 329                                            | -0.258 (-1.701, 1.185)         |                   | 288  | 1.214 (-0.459, 2.888)          |                   |
| <b>4. Screen time weekday</b>     |                  |                                |                   |      |                                |                   |                                                |                                |                   |      |                                |                   |
| ≤2 hours                          | 162              | ref                            |                   | 167  | ref                            |                   | 166                                            | ref                            |                   | 167  | ref                            |                   |
| 3-4 hours                         | 253              | 0.628 (-0.975, 2.231)          |                   | 230  | 0.342 (-0.782, 1.466)          |                   | 256                                            | <b>-1.337 (-2.175, -0.499)</b> |                   | 237  | -0.785 (-1.758, 0.188)         |                   |
| ≥5 hours                          | 116              | <b>4.056 (1.935, 6.176)</b>    |                   | 110  | 0.883 (-0.583, 2.348)          |                   | 121                                            | <b>-3.503 (-4.786, -2.220)</b> |                   | 111  | <b>-1.539 (-2.664, -0.413)</b> |                   |
| <b>5. Screen time weekend</b>     |                  |                                |                   |      |                                |                   |                                                |                                |                   |      |                                |                   |
| ≤2 hours                          | 61               | ref                            |                   | 98   | ref                            |                   | 65                                             | ref                            |                   | 99   | ref                            |                   |
| 3-4 hours                         | 219              | 1.155 (-0.582, 3.369)          |                   | 164  | -0.151 (-1.776, 1.473)         |                   | 225                                            | -0.904 (-2.315, 0.506)         |                   | 166  | 0.157 (-1.725, 1.411)          |                   |
| ≥5 hours                          | 252              | <b>3.340 (1.394, 5.287)</b>    |                   | 243  | 1.060 (-0.207, 2.326)          |                   | 254                                            | <b>-2.520 (-4.014, -1.027)</b> |                   | 248  | -0.842 (-2.320, 0.636)         |                   |

B unstandardized coefficients, beta standardized coefficients, CI confidence interval

MVPA Moderate-to-vigorous physical activity, SED sedentary time, SCAS-S Short version of the Spence Children's Anxiety Scale

All models were adjusted for parental education

Model 3 were adjusted for time spent in MVPA

Models 1-3 were adjusted for accelerometer wear-time

1

## 2 Associations between PA patterns, screen time, and anxiety (SCAS-S)

3 A significant inverse association between time spent in MVPA during leisure time on weekdays  
4 and anxiety was seen in girls and boys. There was a significant interaction of gender in this association  
5 ( $p$  0.01), such that the association was stronger in girls compared to boys. Time spent in MVPA over  
6 the whole week was only significantly associated with anxiety in girls, none of the other MVPA  
7 measured was significantly associated with anxiety among girls or boys. Boys who participated in  
8 organized sports also had a significantly lower prevalence of anxiety, compared to boys who did not  
9 participate. This association was not significant in girls.

10 In girls, time spent in SED during leisure time on weekdays was positively associated with  
11 anxiety. None of the other SED measures was significantly associated with anxiety in girls or boys.

12 With regards to screen time, significant associations were only found in the group of girls who  
13 reported  $\geq 5$  hours screen time on weekdays or weekends. These groups had significantly higher  
14 anxiety scores compared to those who reported up to 2 hours. When controlling for MVPA, this  
15 association remained significant ( $B=3.39$ , CI: 1.33, 5.46) for weekdays and ( $B=2.53$ , CI: 0.27, 4.80)  
16 for weekends. Further, there was a significant interaction of gender in the association between screen-  
17 time on weekends and anxiety with a stronger association among girls compared to boys ( $p<0.03$ ) in  
18 the group who reported  $\geq 5$  hours screen time.

## 20 Associations between PA pattern, screen time, and health-related quality of life (Kiddscreen-10)

21 There was a positive association between time spent in MVPA during the whole week, during  
22 leisure time on weekdays, on weekends, and HRQoL in girls and boys. There was a positive  
23 association between sports participation and HRQoL in boys, however, the significance disappeared  
24 after controlling for time spent in MVPA.

25 Inverse associations were seen between all SED time domains and HRQoL in both boys and girls,  
26 except SED during school time. There was a significant interaction of gender in the association  
27 between time spent in SED on weekends and HRQoL ( $p$  0.04) with a stronger association in boys  
28 compared to girls.

29 Girls and boys who reported  $\geq 5$  hours screen time on weekdays had significantly lower HRQoL,  
30 compared to those who reported two hours or less. The results remained significant also after adjusting  
31 for time spent in MVPA ( $B=-3.32$ , CI: -4.50, -2.14 in girls, and  $B=-1.65$  CI: -2.70, -0.61 in boys). A  
32 significant association between screen time on weekends and HRQoL was only found in girls who  
33 reported  $\geq 5$  hours of screen time.

34  
35 Figure 2 shows the unadjusted mean SCAS-S score and Kiddscreen-10 scores between students  
36 reporting different levels of screen time on weekdays.

37  
38 **[Figure 2 should be inserted here]**

39  
40 To assess the clinical significance, we calculated effect sizes (Cohen's  $d$ ) in mental health scores  
41 between participants/non-participants in organized sports, low/high screen time, and in low/high  
42 tertiles of MVPA. The average time (minutes) for MVPA in the lowest tertile was 32 and 34, and in  
43 the highest tertile 70 and 78 for girls and boys, respectively. Regarding SCAS-S, the effect sizes  
44 between low/high MVPA groups were 0.18 in girls (CI: -0.05, 0.40) and 0.31 in boys (0.07, 0.56). The  
45 effect sizes between participants/non-participants in organized sports were 0.13 (CI: -0.07, 0.31) in  
46 girls and 0.31 (CI: 0.12, 0.51) in boys. The effect sizes between groups with low/high screen time on  
47 weekdays were -0.47 in girls (CI: -0.70, -0.23) and -0.18 in boys (CI: -0.42, 0.05) and on weekends  
48 -0.36 in girls (CI: -0.64, -0.09) and -0.17 (CI: -0.40, 0.06) in boys.

49 For Kiddscreen-10 the results showed that the effect sizes between low/high MVPA groups were  
50 -0.28 in girls (CI: -0.50, -0.06) and -0.51 in boys (CI: -0.75, -0.26) and between participants/non-  
51 participants in organized sports -0.01 (CI: -0.20, 0.18) in girls and -0.28 (CI: -0.47, -0.08) in boys.  
52 Between groups with high/low screen time on weekdays, the effect sizes were 0.59 in girls (CI: 0.36,  
53 0.83) and 0.35 in boys (CI: 0.12, 0.59) and on weekends 0.50 (CI 0.23, 0.77) and 0.14 (CI: -0.9, 0.36)  
54 for girls and boys respectively (these results can be found in table 3 the supplemental material).

## DISCUSSION

In this cross-sectional study, the associations between PA patterns, sports participation, screen time, and mental health (anxiety and HRQoL) were investigated in Swedish adolescents. MVPA was positively associated with HRQoL whereas time spent in SED or using screens on weekdays was inversely associated. Although the effect sizes generally were small, the largest effect sizes were observed between the high/low MVPA group in boys and between the high/low screen time group in girls. With regards to anxiety, high MVPA during leisure time on weekdays was associated with low anxiety scores. Some gender differences were observed, boys participating in organized sports had low anxiety scores whereas girls who reported five hours or more of screen time had high anxiety scores.

The mean Kidscreen-10 score in our sample was 38.3 in girls and 41.0 in boys, which corresponds to a T-score of 47.3 in girls and 51.9 in boys. A suggested threshold to classify the values as “normal” is  $\frac{1}{2}$  SD above or below the reference value [25]. This indicates that our sample was within this range of the Swedish reference population (12-18-year-olds) with a T-score of 49.2 for girls and 52.4 for boys, as well as the overall European T-score based on 11 countries (48.6 for girls and 49.5 for boys) [25]. The current sample also had similar PA levels (on average 52 minutes in MVPA per day) and demographic characteristics (66% had parents with  $\geq 12$  years of education, 86% were born in Sweden and 21% had overweight or obesity) compared to a nationally representative study in Swedish adolescents which reported on average 53 minutes in MVPA per day, 61% with high parental education, 88% born in Sweden, 21% with overweight or obesity [14].

The most common limitation in previous studies is the lack of detailed measures of PA. The current study used device-measured PA and could confirm many findings based on self-reported PA. One example is a review that found PA to be positively associated with HRQoL and a high proportion of SED to be associated with lower HRQoL [26]. In general, the effect sizes in the current study were small, which is not uncommon in these types of studies. A previous study by Gopinath et al. found similar mean differences in HRQoL between the high/low group of PA and screen time [27]. However, this study did not stratify the analysis by gender. In our study, we found the largest effect sizes when comparing the lowest and highest tertiles of MVPA for boys (Cohen's  $d = 0.51$ ), and screen time for girls (Cohen's  $d = 0.50$  on weekends) and (Cohen's  $d = 0.59$  on weekdays). Our findings suggest that the strengths of the associations to HRQoL could be different for boys and girls and these gender differences should be considered when designing future intervention studies to improve HRQoL.

Regarding screen time, this study found high screen time during weekdays to be associated with lower HRQoL which confirms the findings of a review that concluded moderate evidence for the association between screen time and HRQoL. In the current study, we found a significant difference in MVPA between the low/high screen time group. Interestingly, after controlling for time spent in MVPA screen time was still significantly associated with HRQoL independently of MVPA in both genders. As previously mentioned, we found the effect size of screen time to be larger in girls. These findings are similar to a study from the UK which concluded that the association between screen time and mental health was stronger in girls. The same study also found that the dose of screen time associated with problematic mental health was lower for girls ( $>2$  hours) compared to boys ( $>5$  hours) [28]. This was also evident in the current study, where screen time  $>3$  hours were associated with lower HRQoL in girls, whereas for boys this association was significant only for the group reporting  $\geq 5$  hours.

A strength of this study is the inclusion of both a positive and a negative indicator of mental health, which shows that the type of PA pattern and screen time associated with each measure differs. Fewer measures of the PA pattern and screen time were significantly associated with anxiety compared to HRQoL. MVPA during leisure time on weekdays was inversely associated with anxiety in both genders. These results are consistent with those reported previously using self-reported PA [29, 30]. However, we only found sports participation to be associated with lower anxiety in boys. These

1  
2  
3  
4  
5 108 findings were different from a study in 14-year-old that found sports participation to be significantly  
6 109 associated with lower anxiety and higher well-being in both genders [31]. Potential explanations for  
7 110 this could be that the study did not control for time spent in MVPA and that sports participation was  
8 111 lower (33%) compared to 72% in our study. Another study in older youth found that the significant  
9 112 association between sports participation and anxiety disappeared after controlling for time spent in  
10 113 MVPA [12]. Previous studies have also suggested that the strength of the association could vary  
11 114 between genders. A review found a weak negative correlation between sports participation and  
12 115 anxiety, but in samples with a higher proportion of boys, the correlation was stronger [32]. One  
13 116 potential explanation for the gender differences observed in the current study could be related to the  
14 117 context and sports environment. Where girls have reported a higher incidence of teasing during sports  
15 118 participation and participation in sports common to girls (aesthetic sports such as dance or gymnastics)  
16 119 have been associated with body image concerns and disordered eating [33]. This indicates that  
17 120 depending on the sports culture the association between sports participation and mental health could  
18 121 differ between genders, this should be investigated further in future research.  
19 122

20 123 About screen time, this study found that girls reporting  $\geq 5$  hours of screen time on weekdays and  
21 124 weekends had higher levels of anxiety compared to those who reported  $\leq 2$  hours. This association was  
22 125 not seen in boys. These findings were consistent with a study in Icelandic adolescents, that found  
23 126 screen time  $< 5$  hours to be associated with fewer symptoms of anxiety and depression [30]. However,  
24 127 the results were not stratified by gender. Although not investigated in the current study, one suggested  
25 128 explanation for the gender differences in the type of screen time activity. A review found social media  
26 129 use to be associated with anxiety, with a stronger association in girls [34] future studies should further  
27 130 investigate these associations. With regards to screen time, it is important to acknowledge the  
28 131 methodological challenges of measuring screen time, and that there is no consensus of how to best  
29 132 capture these behaviors. In this study self-reported screen time was used with broad questions that  
30 133 included all types of screen devices and activities, except schoolwork. When comparing self-reported  
31 134 screen time to more objective measures (using an app for example) some underreporting is evident,  
32 135 although total daily duration was more accurately reported compared to number of phone use [35]. In  
33 136 the current study self-report was used to decrease participant burden and privacy invasion, but it is  
34 137 worth noting that the screen time duration acquired in this study should not be considered an exact  
35 138 dose but rather interpreted as a proxy for high/low screen users.  
36 139

37 140 There is a lack of studies that investigate the association between device-measured SED and  
38 141 mental health and many studies rely on screen time as a proxy for SED. In the current study, stronger  
39 142 associations were seen in the standardized beta coefficients for the SED measurements (especially  
40 143 during leisure time weekdays), compared to MVPA. This was seen in both genders for HRQoL and  
41 144 anxiety for girls. A review concluded that sedentary behaviors were associated with an increased risk  
42 145 of anxiety, with the strongest associations found in sitting [36]. However, it is important to note that  
43 146 causation or the direction of these associations cannot be studied in cross-sectional studies.  
44 147 Interestingly, a randomized controlled trial (RCT) showed significantly higher anxiety levels in the  
45 148 intervention group after a one-week intervention of increased SED and eliminated PA compared to the  
46 149 control group, which continued their normal PA routine [37]. These findings suggest that reducing  
47 150 SED could be a strategy to improve mental health among adolescents, although this should be  
48 151 investigated further in larger RCT studies.  
49 152

50 153 A limitation of the current study was the lack of questions concerning functioning to further  
51 154 understand if the group with low mental health experienced impairment in their daily lives. However,  
52 155 including a positive and negative measure still provides a better understanding of the students' overall  
53 156 mental health compared to studies that only focus on symptoms of mental illness. Moreover, other  
54 157 measures not included in this article such as academic attainment and cognition could be important in  
55 158 this association. Another limitation was the cross-sectional design, which makes it impossible to study  
56 159 the direction or cause of these relationships. A strength was the detailed PA measure (accelerometer)  
57 160 with individual time filters, which enabled comparisons between different time domains. Furthermore,

1  
2  
3  
4  
5 161 the relatively large sample size and a high participation rate (73%), which resulted in a non-  
6 162 homogenous study population of adolescents with different PA levels and mental health scores. As our  
7 163 population were within the range of the European norm values for HRQoL it is plausible that our  
8 164 findings could be generalized to other European adolescent populations. However, as our  
9 165 questionnaires were in Swedish, immigrant adolescents with a low proficiency in Swedish could not  
10 166 participate, neither did we have a representation of adolescents with physical impairments. Therefore,  
11 167 future studies should ensure that these groups are represented as well to enhance the generalizability of  
12 168 the findings.  
13 169  
14 170

## 15 171 **CONCLUSIONS**

16 172 This cross-sectional study showed that MVPA was associated with better mental health, whereas SED  
17 173 or screen time was associated with lower mental health. However, these associations were not  
18 174 significant throughout all time domains and some gender differences were observed. Although this  
19 175 cross-sectional study cannot conclude causation or direction the relationship, our results suggests that  
20 176 adolescents with worse mental health scores also spend less time being physically active and more  
21 177 time being sedentary or using screens. Therefore, it is important in future research and school efforts  
22 178 to consider how to reach this group, as they might be the ones most in need of an intervention. Our  
23 179 results could create a paradigm for future studies to decide which types of PA patterns and time  
24 180 domains to target in intervention studies with the aim improve mental health among adolescents.  
25 181  
26  
27  
28  
29  
30  
31  
32  
33  
34  
35  
36  
37  
38  
39  
40  
41  
42  
43  
44  
45  
46  
47  
48  
49  
50  
51  
52  
53  
54  
55  
56  
57  
58  
59  
60

## LEGENDS

**Figure 1.** Participation of schools and students.

**Figure 2.** Unadjusted means SCAS-S and Kidscreen-10 score between screen time groups, mean comparisons were analyzed using an Analysis of variance ANOVA and Bonferroni post hoc test  
\*\*\* p <0.001 \*\* p <0.01

## DECLARATIONS

**Acknowledgments:** We want to thank all the students, their parents, and the teachers involved in the study. We would also like to thank the hard-working research personnel involved in the data collection making this study possible.

**Competing interests:** The authors have no competing interests relevant to this article to declare.

**Funding:** This study is part of the “Physical activity for healthy brain functions in school youth”, which was funded by the Knowledge Foundation (grant 20180040) and conducted in collaboration with Coop, IKEA, Skanska, Skandia, Stockholm Consumer Cooperative Society, and the Swedish Crown Princess Couple’s Foundation/Generation Pep.

**Data sharing:** The datasets are not available for download to protect the confidentiality of the participants. The data are held at The Swedish School of Sport and Health Sciences.

**Authors' contributions:** KK recruited the schools. GN, ÖE, BH, KK designed the study and participated in the data collection. BH cleaned and processed the data. JÅ contributed to the design of the statistical model and the interpretation of the results. KK drafted the manuscript. All authors read and approved the final manuscript as submitted and agree to be accountable for all aspects of the work.

**REFERENCES**

1. World Health Organization. Basic documents: World Health Organization, 2020.
2. Gore FM, Bloem PJ, Patton GC, et al. Global burden of disease in young people aged 10–24 years: a systematic analysis. *The Lancet* 2011;377(9783):2093-102.
3. Patel V, Flisher AJ, Hetrick S, et al. Mental health of young people: a global public-health challenge. *the Lancet* 2007;369(9569):1302-13.
4. Solmi M, Radua J, Olivola M, et al. Age at onset of mental disorders worldwide: large-scale meta-analysis of 192 epidemiological studies. *Mol Psychiatry* 2021:1-15.
5. Polanczyk GV, Salum GA, Sugaya LS, et al. Annual research review: A meta-analysis of the worldwide prevalence of mental disorders in children and adolescents. *Journal of child psychology and psychiatry* 2015;56(3):345-65.
6. Bell SL, Audrey S, Gunnell D, et al. The relationship between physical activity, mental wellbeing and symptoms of mental health disorder in adolescents: a cohort study. *International Journal of Behavioral Nutrition and Physical Activity* 2019;16(1):138.
7. McMahon EM, Corcoran P, O'Regan G, et al. Physical activity in European adolescents and associations with anxiety, depression and well-being. *European child & adolescent psychiatry* 2017;26(1):111-22.
8. Kremer P, Elshaug C, Leslie E, et al. Physical activity, leisure-time screen use and depression among children and young adolescents. *Journal of science and medicine in sport* 2014;17(2):183-87.
9. Sigvartsen J, Gabrielsen LE, Abildsnes E, et al. Exploring the relationship between physical activity, life goals and health-related quality of life among high school students: a cross-sectional study. *BMC public health* 2016;16(1):709.
10. Biddle SJ, Ciaccioni S, Thomas G, et al. Physical activity and mental health in children and adolescents: An updated review of reviews and an analysis of causality. *Psychology of Sport and Exercise* 2018
11. Kleppang AL, Hartz I, Thurston M, et al. The association between physical activity and symptoms of depression in different contexts—a cross-sectional study of Norwegian adolescents. *BMC public health* 2018;18(1):1368.
12. Doré I, O'Loughlin JL, Beauchamp G, et al. Volume and social context of physical activity in association with mental health, anxiety and depression among youth. *Preventive Medicine* 2016;91:344-50.
13. Guthold R, Stevens GA, Riley LM, et al. Global trends in insufficient physical activity among adolescents: a pooled analysis of 298 population-based surveys with 1· 6 million participants. *The Lancet Child & Adolescent Health* 2019
14. Nyberg G, Kjellenberg K, Fröberg A, et al. A national survey showed low levels of physical activity in a representative sample of Swedish adolescents. *Acta Paediatrica* 2020
15. Hoare E, Milton K, Foster C, et al. The associations between sedentary behaviour and mental health among adolescents: a systematic review. *International journal of behavioral nutrition and physical activity* 2016;13(1):108.
16. Liu M, Wu L, Yao S. Dose–response association of screen time-based sedentary behaviour in children and adolescents and depression: a meta-analysis of observational studies. *Br J Sports Med* 2016;50(20):1252-58.
17. Corder K, Ekelund U, Steele RM, et al. Assessment of physical activity in youth. *Journal of applied physiology* 2008;105(3):977-87.
18. Trumberg A, Urban S. School Choice and Its Long-Term Impact on Social Mobility in Sweden. *Scandinavian Journal of Educational Research* 2021;65(4):569-83. doi: 10.1080/00313831.2020.1739129
19. Nyberg G, Ekblom Ö, Kjellenberg K, et al. Associations between the School Environment and Physical Activity Pattern during School Time in Swedish Adolescents. *International Journal of Environmental Research and Public Health* 2021;18(19):10239.



20. Ravens-Sieberer U, Erhart M, Rajmil L, et al. Reliability, construct and criterion validity of the KIDSCREEN-10 score: a short measure for children and adolescents' well-being and health-related quality of life. *Quality of Life Research* 2010;19(10):1487-500.
21. Ahlen J, Vigerland S, Ghaderi A. Development of the Spence Children's Anxiety Scale-Short Version (SCAS-S). *Journal of psychopathology and behavioral assessment* 2018;40(2):288-304.
22. Evenson KR, Catellier DJ, Gill K, et al. Calibration of two objective measures of physical activity for children. *Journal of sports sciences* 2008;26(14):1557-65.
23. Cole TJ, Lobstein T. Extended international (IOTF) body mass index cut-offs for thinness, overweight and obesity. *Pediatric obesity* 2012;7(4):284-94.
24. Karlberg J, Luo Z, Albertsson-Wikland K. Body mass index reference values (mean and SD) for Swedish children. *Acta Paediatrica* 2001;90(12):1427-34.
25. KIDSCREEN Group. Europe.(2006). The KIDSCREEN questionnaires: quality of life questionnaires for children and adolescents. *Handbook Lengerich Pabst Science Publishers, Germany* 2011
26. Wu XY, Han LH, Zhang JH, et al. The influence of physical activity, sedentary behavior on health-related quality of life among the general population of children and adolescents: A systematic review. *PloS one* 2017;12(11):e0187668.
27. Gopinath B, Hardy LL, Baur LA, et al. Physical activity and sedentary behaviors and health-related quality of life in adolescents. *Pediatrics* 2012;130(1):e167-e74.
28. Twenge JM, Farley E. Not all screen time is created equal: associations with mental health vary by activity and gender. *Social psychiatry and psychiatric epidemiology* 2021;56(2):207-17.
29. Bélair MA, Kohen DE, Kingsbury M, et al. Relationship between leisure time physical activity, sedentary behaviour and symptoms of depression and anxiety: evidence from a population-based sample of Canadian adolescents. *BMJ Open* 2018;8(10):e021119. doi: 10.1136/bmjopen-2017-021119 [published Online First: 2018/10/20]
30. Hrafnkelsdottir SM, Brychta RJ, Rognvaldsdottir V, et al. Less screen time and more frequent vigorous physical activity is associated with lower risk of reporting negative mental health symptoms among Icelandic adolescents. *PLoS One* 2018;13(4):e0196286. doi: 10.1371/journal.pone.0196286 [published Online First: 2018/04/27]
31. McMahon EM, Corcoran P, O'Regan G, et al. Physical activity in European adolescents and associations with anxiety, depression and well-being. *Eur Child Adolesc Psychiatry* 2017;26(1):111-22. doi: 10.1007/s00787-016-0875-9 [published Online First: 2016/06/10]
32. Panza MJ, Graupensperger S, Agans JP, et al. Adolescent sport participation and symptoms of anxiety and depression: A systematic review and meta-analysis. *Journal of sport and exercise psychology* 2020;42(3):201-18.
33. Slater A, Tiggemann M. Gender differences in adolescent sport participation, teasing, self-objectification and body image concerns. *Journal of adolescence* 2011;34(3):455-63.
34. Keles B, McCrae N, Grealish A. A systematic review: the influence of social media on depression, anxiety and psychological distress in adolescents. *International Journal of Adolescence and Youth* 2020;25(1):79-93.
35. Andrews S, Ellis DA, Shaw H, et al. Beyond Self-Report: Tools to Compare Estimated and Real-World Smartphone Use. *PLoS One* 2015;10(10):e0139004. doi: 10.1371/journal.pone.0139004 [published Online First: 2015/10/29]
36. Allen MS, Walter EE, Swann C. Sedentary behaviour and risk of anxiety: a systematic review and meta-analysis. *Journal of Affective Disorders* 2019;242:5-13.
37. Edwards MK, Loprinzi PD. Experimentally increasing sedentary behavior results in increased anxiety in an active young adult population. *Journal of affective disorders* 2016;204:166-73.

1  
2  
3  
4  
5  
6  
7  
8  
9  
10  
11  
12  
13  
14  
15  
16  
17  
18  
19  
20  
21  
22  
23  
24  
25  
26  
27  
28  
29  
30  
31  
32  
33  
34  
35  
36  
37  
38  
39  
40  
41  
42  
43  
44  
45  
46  
47  
48  
49  
50  
51  
52  
53  
54  
55  
56  
57  
58  
59  
60

For peer review only



228x275mm (72 x 72 DPI)

1  
2  
3  
4  
5  
6  
7  
8  
9  
10  
11  
12  
13  
14  
15  
16  
17  
18  
19  
20  
21  
22  
23  
24  
25  
26  
27  
28  
29  
30  
31  
32  
33  
34  
35  
36  
37  
38  
39  
40  
41  
42  
43  
44  
45  
46  
47  
48  
49  
50  
51  
52  
53  
54  
55  
56  
57  
58  
59  
60



216x87mm (300 x 300 DPI)

SUPPLEMENTAL MATERIAL

**Supplemental material 1.** Crude and adjusted associations between predictors and anxiety (SCAS-S) and health-related quality of life (Kidsscreen-10) were analyzed with multi-level mixed linear regression models

| Model                             | Anxiety (SCAS-S) |                                |                   |          |                                |                   | Health-related quality of life (Kidsscreen-10) |                                 |                   |          |                                |                   |
|-----------------------------------|------------------|--------------------------------|-------------------|----------|--------------------------------|-------------------|------------------------------------------------|---------------------------------|-------------------|----------|--------------------------------|-------------------|
|                                   | Crude            |                                |                   | Adjusted |                                |                   | Crude                                          |                                 |                   | Adjusted |                                |                   |
|                                   | n                | Unstandardized B (95% CI)      | Standardized beta | n        | Unstandardized B (95% CI)      | Standardized beta | n                                              | Unstandardized B (95% CI)       | Standardized beta | n        | Unstandardized B (95% CI)      | Standardized beta |
| <b>1. MVPA</b>                    |                  |                                |                   |          |                                |                   |                                                |                                 |                   |          |                                |                   |
| 1.1 MVPA whole week               | 854              | <b>-0.058 (-0.091, -0.025)</b> | <b>-0.138</b>     | 831      | <b>-0.035 (-0.062, -0.007)</b> | <b>-0.082</b>     | 873                                            | <b>0.044 (0.028, 0.060)</b>     | <b>0.157</b>      | 848      | <b>0.036 (0.021, 0.051)</b>    | <b>0.130</b>      |
| 1.2 MVPA leisure time (weekdays)  | 1000             | <b>-0.072 (-0.106, -0.038)</b> | -0.136            | 971      | <b>-0.062 (-0.089, -0.034)</b> | <b>-0.118</b>     | 1023                                           | <b>0.049 (0.029, 0.068)</b>     | <b>0.137</b>      | 991      | <b>0.043 (0.025, 0.061)</b>    | <b>0.122</b>      |
| 1.3 MVPA leisure time (weekend)   | 866              | -0.017 (-0.038, 0.004)         | -0.053            | 843      | -0.011 (-0.030, 0.010)         | -0.033            | 886                                            | <b>0.030 (0.019, 0.041)</b>     | <b>0.144</b>      | 861      | <b>0.028 (0.017, 0.039)</b>    | <b>0.135</b>      |
| 1.4 MVPA school time              | 1000             | -0.095 (-0.147, -0.043)        | -0.135            | 971      | -0.006 (-0.047, 0.036)         | -0.008            | 1023                                           | <b>0.056 (0.022, 0.090)</b>     | <b>0.117</b>      | 991      | 0.019 (-0.013, 0.052)          | 0.052             |
| <b>2. SED</b>                     |                  |                                |                   |          |                                |                   |                                                |                                 |                   |          |                                |                   |
| 2.1 SED whole week                | 854              | <b>0.009 (0.002, 0.017)</b>    | 0.077             | 831      | 0.011 (-0.004, 0.026)          | 0.089             | 873                                            | <b>-0.009 (-0.016, -0.0002)</b> | <b>-0.113</b>     | 848      | <b>-0.021 (-0.029, -0.012)</b> | <b>-0.261</b>     |
| 2.2 SED bouts (10 min) whole week | 854              | 0.008 (-0.001, 0.017)          | 0.064             | 831      | 0.000 (-0.010, 0.010)          | 0.001             | 873                                            | <b>-0.013 (-0.018, -0.007)</b>  | <b>-0.155</b>     | 848      | <b>-0.011 (-0.016, -0.005)</b> | <b>-0.130</b>     |
| 2.3 SED leisure time (weekdays)   | 1000             | <b>0.009 (0.004, 0.015)</b>    | <b>0.081</b>      | 971      | <b>0.026 (0.011, 0.041)</b>    | <b>0.228</b>      | 1023                                           | -0.005 (-0.009, 0.000)          | -0.063            | 991      | <b>-0.027 (-0.040, -0.015)</b> | <b>-0.358</b>     |
| 2.4 SED leisure time (weekend)    | 866              | -0.003 (-0.009, 0.002)         | -0.036            | 843      | 0.004 (-0.007, 0.015)          | 0.042             | 886                                            | -0.004 (-0.008, 0.001)          | -0.056            | 861      | <b>-0.014 (-0.020, -0.008)</b> | <b>-0.230</b>     |
| 2.5 SED school                    | 1000             | <b>0.024 (0.009, 0.039)</b>    | <b>0.112</b>      | 971      | -0.009 (-0.030, 0.011)         | -0.045            | 1023                                           | <b>-0.013 (-0.025, -0.001)</b>  | <b>-0.091</b>     | 991      | -0.011 (-0.026, 0.004)         | -0.079            |
| <b>3. Organized sports</b>        |                  |                                |                   |          |                                |                   |                                                |                                 |                   |          |                                |                   |
| Did not participate               | 291              | ref                            |                   | 209      | ref                            |                   | 296                                            | ref                             |                   | 213      | ref                            |                   |
| Participated                      | 750              | <b>-1.589 (-2.743, -0.435)</b> |                   | 604      | -0.963 (-2.07, 0.141)          |                   | 766                                            | <b>0.855 (0.036, 1.674)</b>     |                   | 617      | 0.407 (-0.554, 1.367)          |                   |
| <b>4. Screen time weekday</b>     |                  |                                |                   |          |                                |                   |                                                |                                 |                   |          |                                |                   |
| ≤2 hours                          | 343              | ref                            |                   | 329      | ref                            |                   | 348                                            | ref                             |                   | 333      | ref                            |                   |
| 3-4 hours                         | 492              | 0.388 (-0.599, 1.375)          |                   | 483      | 0.407 (-0.481, 1.295)          |                   | 503                                            | <b>-0.827 (-1.529, -0.124)</b>  |                   | 493      | <b>-1.007 (-1.591, -0.423)</b> |                   |
| ≥5 hours                          | 235              | <b>2.626 (1.135, 4.117)</b>    |                   | 226      | <b>2.409 (1.083, 3.735)</b>    |                   | 242                                            | <b>-2.521 (-1.529, -0.125)</b>  |                   | 232      | <b>-2.633 (-3.381, -1.885)</b> |                   |
| <b>5. Screen time weekend</b>     |                  |                                |                   |          |                                |                   |                                                |                                 |                   |          |                                |                   |
| ≤2 hours                          | 169              | ref                            |                   | 159      | ref                            |                   | 174                                            | ref                             |                   | 164      | ref                            |                   |
| 3-4 hours                         | 392              | <b>1.302 (0.132, 2.471)</b>    |                   | 383      | 0.461 (-0.609, 1.531)          |                   | 402                                            | -0.594 (-1.474, 0.286)          |                   | 391      | -0.261 (-1.078, 0.555)         |                   |
| ≥5 hours                          | 507              | <b>2.368 (1.236, 3.501)</b>    |                   | 495      | <b>1.896 (0.881, 2.912)</b>    |                   | 515                                            | <b>-1.607 (-2.582, -0.633)</b>  |                   | 502      | <b>-1.485 (-2.385, -0.585)</b> |                   |

B unstandardized coefficients, beta standardized coefficients, CI confidence interval

MVPA Moderate-to-vigorous physical activity, SED sedentary time, SCAS-S Short version of the Spence Children’s Anxiety Scale

The adjusted models have been controlled for gender and parental education. Further, Model 3 were adjusted for time spent in MVPA, and Models 1-3 were adjusted for accelerometer wear-time

**Supplemental material 2.** Crude associations between predictors and anxiety (SCAS-S) and health-related quality of life (Kidsscreen-10) were analyzed with multi-level mixed linear regression models stratified by gender

| Model                             | Anxiety (SCAS-S) |                                |                   |      |                                |                   | Health-related quality of life (Kidsscreen-10) |                                 |                   |      |                                 |                   |
|-----------------------------------|------------------|--------------------------------|-------------------|------|--------------------------------|-------------------|------------------------------------------------|---------------------------------|-------------------|------|---------------------------------|-------------------|
|                                   | Girls            |                                |                   | Boys |                                |                   | Girls                                          |                                 |                   | Boys |                                 |                   |
|                                   | n                | Unstandardized B (95% CI)      | Standardized beta | n    | Unstandardized B (95% CI)      | Standardized beta | n                                              | Unstandardized B (95% CI)       | Standardized beta | n    | Unstandardized B (95% CI)       | Standardized beta |
| <b>1. MVPA</b>                    |                  |                                |                   |      |                                |                   |                                                |                                 |                   |      |                                 |                   |
| 1.1 MVPA whole week               | 461              | <b>-0.043 (-0.079, -0.007)</b> | <b>-0.095</b>     | 393  | <b>-0.026 (-0.060, 0.008)</b>  | <b>-0.078</b>     | 473                                            | <b>0.027 (0.004, 0.05)</b>      | <b>0.093</b>      | 400  | <b>0.044 (0.020, 0.069)</b>     | <b>0.171</b>      |
| 1.2 MVPA leisure time (weekdays)  | 517              | <b>-0.096 (-0.139, -0.055)</b> | <b>-0.169</b>     | 483  | <b>-0.037 (-0.067, -0.007)</b> | <b>-0.090</b>     | 531                                            | <b>0.049 (0.023, 0.07)</b>      | <b>0.132</b>      | 492  | <b>0.042 (0.018, 0.067)</b>     | <b>0.130</b>      |
| 1.3 MVPA leisure time (weekend)   | 468              | -0.021 (-0.049, 0.006)         | -0.063            | 398  | -0.003 (-0.025, 0.019)         | -0.011            | 480                                            | 0.021 (-0.001, 0.043)           | 0.095             | 406  | <b>0.036 (0.021, 0.050)</b>     | <b>0.189</b>      |
| 1.4 MVPA school time              | 517              | -0.012 (-0.080, 0.056)         | -0.015            | 483  | 0.004 (-0.047, 0.054)          | 0.007             | 531                                            | 0.003 (-0.042, 0.048)           | 0.005             | 492  | 0.028 (-0.009, 0.066)           | 0.0637            |
| <b>2. SED</b>                     |                  |                                |                   |      |                                |                   |                                                |                                 |                   |      |                                 |                   |
| 2.1 SED whole week                | 461              | 0.000 (-0.008, 0.010)          | 0.004             | 393  | 0.006 (-0.002, 0.014)          | 0.063             | 473                                            | -0.004 (-0.012, 0.003)          | -0.057            | 400  | -0.009 (-0.018, 0.000)          | -0.119            |
| 2.2 SED bouts (10 min) whole week | 461              | -0.002 (-0.014, 0.009)         | -0.017            | 393  | 0.003 (-0.008, 0.014)          | 0.028             | <b>473</b>                                     | <b>-0.010 (-0.016, -0.003)</b>  | <b>-0.122</b>     | 400  | <b>-0.0100 (-0.018, -0.002)</b> | -0.120            |
| 2.3 SED leisure time (weekdays)   | 517              | 0.001 (-0.007, 0.010)          | 0.010             | 483  | 0.008 (0.001, 0.014)           | 0.087             | 531                                            | -0.003 (-0.009, -0.004)         | <b>-0.033</b>     | 492  | -0.004 (-0.010, 0.003)          | -0.052            |
| 2.4 SED leisure time (weekend)    | 468              | -0.003 (-0.011, 0.004)         | -0.033            | 398  | -0.000 (-0.008, 0.008)         | -0.002            | 480                                            | 0.004 (-0.005, 0.006)           | 0.006             | 406  | <b>-0.009 (-0.014, -0.004)</b>  | <b>-0.155</b>     |
| 2.5 SED school                    | 517              | 0.009 (-0.007, 0.025)          | 0.042             | 483  | -0.010 (-0.027, 0.006)         | -0.056            | 531                                            | 0.000 (-0.016, 0.016)           | -0.000            | 492  | -0.005 (-0.020, 0.010)          | -0.034            |
| <b>3. Organized sports</b>        |                  |                                |                   |      |                                |                   |                                                |                                 |                   |      |                                 |                   |
| Did not participate               | 152              | ref                            |                   | 139  | ref                            |                   | 155                                            | ref                             |                   | 141  | ref                             |                   |
| Participated                      | 376              | -0.914 (-2.528, 0.700)         |                   | 374  | <b>-2.009 (-3.445, -0.572)</b> |                   | 386                                            | 0.132 (-1.110, 1.375)           |                   | 380  | 1.358 (0.133, 2.58)             |                   |
| <b>4. Screen time weekday</b>     |                  |                                |                   |      |                                |                   |                                                |                                 |                   |      |                                 |                   |
| ≤2 hours                          | 168              | ref                            |                   | 175  | ref                            |                   | 173                                            | ref                             |                   | 175  | ref                             |                   |
| 3-4 hours                         | 257              | 0.550 (-0.984, 2.084)          |                   | 235  | 0.014 (-1.135, 1.162)          |                   | 261                                            | <b>-1.095 (-19.976, -0.213)</b> |                   | 242  | -0.587 (-1.546, 0.372)          |                   |
| ≥5 hours                          | 120              | <b>3.856 (1.916, 5.796)</b>    |                   | 115  | 1.190 (-0.143, 2.523)          |                   | 126                                            | <b>-3.190 (-4.292, -2.089)</b>  |                   | 116  | <b>-1.609 (-2.845, -0.372)</b>  |                   |
| <b>5. Screen time weekend</b>     |                  |                                |                   |      |                                |                   |                                                |                                 |                   |      |                                 |                   |
| ≤2 hours                          | 546              | ref                            |                   | 104  | ref                            |                   | 69                                             | ref                             |                   | 105  | ref                             |                   |
| 3-4 hours                         | 65               | 1.126 (-1.097, 3.350)          |                   | 168  | -0.163 (-1.719, 1.393)         |                   | 232                                            | -0.903 (-2.388, 0.582)          |                   | 170  | 0.0449 (-1.504, 1.594)          |                   |
| ≥5 hours                          | 224              | <b>2.931 (0.924, 4.938)</b>    |                   | 250  | 0.992 (-0.222, 2.206)          |                   | 260                                            | <b>-2.530 (-4.036, -1.025)</b>  |                   | 255  | -0.615 (-2.100, 0.870)          |                   |

B unstandardized coefficients, beta standardized coefficients, CI confidence interval  
MVPA Moderate-to-vigorous physical activity, SED sedentary time, SCAS-S Short version of the Spence Children's Anxiety Scale

**Supplemental material 3.** Unadjusted mean SCAS-S and Kidscreen-10 score and SD for students in the highest and lowest groups of MVPA and screen time

|                          | Anxiety (SCAS-S) |             |      |            | Health-related quality of life (Kidscreen-10) |            |      |            |
|--------------------------|------------------|-------------|------|------------|-----------------------------------------------|------------|------|------------|
|                          | Girls            |             | Boys |            | Girls                                         |            | Boys |            |
|                          | n                | mean ± SD   | n    | mean ± SD  | n                                             | mean ± SD  | n    | mean ± SD  |
| <b>Screen time</b>       |                  |             |      |            |                                               |            |      |            |
| <b>Weekday</b>           |                  |             |      |            |                                               |            |      |            |
| ≤2 hours                 | 168              | 15.46 ±8.37 | 175  | 10.29±6.60 | 173                                           | 39.62±5.29 | 175  | 41.70±5.22 |
| ≥5 hours                 | 120              | 19.33±8.24  | 115  | 11.56±7.25 | 126                                           | 36.40±5.60 | 116  | 39.78±5.78 |
| <b>Weekend</b>           |                  |             |      |            |                                               |            |      |            |
| ≤2 hours                 | 65               | 14.71±7.19  | 104  | 10.04±6.73 | 69                                            | 39.96±5.34 | 105  | 41.34±5.77 |
| ≥5 hours                 | 257              | 17.69±8.43  | 250  | 11.21±6.84 | 260                                           | 37.35±5.19 | 255  | 40.59±5.44 |
| <b>Physical activity</b> |                  |             |      |            |                                               |            |      |            |
| MVPA lowest tertile      | 157              | 17.07±8.77  | 128  | 12.06±7.48 | 160                                           | 37.83±5.25 | 135  | 39.65±5.94 |
| MVPA highest tertile     | 152              | 15.65±6.98  | 130  | 9.89±6.32  | 157                                           | 39.20±4.58 | 130  | 42.32±4.47 |
| <b>Organized sports</b>  |                  |             |      |            |                                               |            |      |            |
| Did not participate      | 376              | 16.31±7.67  | 374  | 10.02±6.28 | 386                                           | 38.41±5.01 | 380  | 41.41±4.90 |
| Participated             | 152              | 17.28±8.61  | 139  | 12.06±7.01 | 155                                           | 38.35±5.59 | 141  | 39.97±5.77 |

MVPA moderate-to-vigorous-physical activity, SED sedentary time, SCAS-S Short version of the Spence Children's Anxiety Scale

**STROBE 2007 (v4) Statement—Checklist of items that should be included in reports of *cross-sectional studies***

| Section/Topic                | Item # | Recommendation                                                                                                                                                                       | Reported on page # |
|------------------------------|--------|--------------------------------------------------------------------------------------------------------------------------------------------------------------------------------------|--------------------|
| <b>Title and abstract</b>    | 1      | (a) Indicate the study’s design with a commonly used term in the title or the abstract                                                                                               | 1                  |
|                              |        | (b) Provide in the abstract an informative and balanced summary of what was done and what was found                                                                                  | 1                  |
| <b>Introduction</b>          |        |                                                                                                                                                                                      |                    |
| Background/rationale         | 2      | Explain the scientific background and rationale for the investigation being reported                                                                                                 | 2                  |
| Objectives                   | 3      | State specific objectives, including any prespecified hypotheses                                                                                                                     | 2                  |
| <b>Methods</b>               |        |                                                                                                                                                                                      |                    |
| Study design                 | 4      | Present key elements of study design early in the paper                                                                                                                              | 2                  |
| Setting                      | 5      | Describe the setting, locations, and relevant dates, including periods of recruitment, exposure, follow-up, and data collection                                                      | 2-3                |
| Participants                 | 6      | (a) Give the eligibility criteria, and the sources and methods of selection of participants                                                                                          | 2                  |
| Variables                    | 7      | Clearly define all outcomes, exposures, predictors, potential confounders, and effect modifiers. Give diagnostic criteria, if applicable                                             | 3-4                |
| Data sources/<br>measurement | 8*     | For each variable of interest, give sources of data and details of methods of assessment (measurement). Describe comparability of assessment methods if there is more than one group | 3-4                |
| Bias                         | 9      | Describe any efforts to address potential sources of bias                                                                                                                            | 3-4                |
| Study size                   | 10     | Explain how the study size was arrived at                                                                                                                                            | 2                  |
| Quantitative variables       | 11     | Explain how quantitative variables were handled in the analyses. If applicable, describe which groupings were chosen and why                                                         | 3-4                |
| Statistical methods          | 12     | (a) Describe all statistical methods, including those used to control for confounding                                                                                                | 4                  |
|                              |        | (b) Describe any methods used to examine subgroups and interactions                                                                                                                  | 4                  |
|                              |        | (c) Explain how missing data were addressed                                                                                                                                          | 4                  |
|                              |        | (d) If applicable, describe analytical methods taking account of sampling strategy                                                                                                   | n/a                |
|                              |        | (e) Describe any sensitivity analyses                                                                                                                                                | 4                  |
| <b>Results</b>               |        |                                                                                                                                                                                      |                    |



|                          |     |                                                                                                                                                                                                              |                                                       |
|--------------------------|-----|--------------------------------------------------------------------------------------------------------------------------------------------------------------------------------------------------------------|-------------------------------------------------------|
| Participants             | 13* | (a) Report numbers of individuals at each stage of study—eg numbers potentially eligible, examined for eligibility, confirmed eligible, included in the study, completing follow-up, and analysed            | 3-7                                                   |
|                          |     | (b) Give reasons for non-participation at each stage                                                                                                                                                         | 3, 5                                                  |
|                          |     | (c) Consider use of a flow diagram                                                                                                                                                                           | 3                                                     |
| Descriptive data         | 14* | (a) Give characteristics of study participants (eg demographic, clinical, social) and information on exposures and potential confounders                                                                     | 6                                                     |
|                          |     | (b) Indicate number of participants with missing data for each variable of interest                                                                                                                          | 6                                                     |
| Outcome data             | 15* | Report numbers of outcome events or summary measures                                                                                                                                                         | 6-7                                                   |
| Main results             | 16  | (a) Give unadjusted estimates and, if applicable, confounder-adjusted estimates and their precision (eg, 95% confidence interval). Make clear which confounders were adjusted for and why they were included | 6-8, and in the supplemental material (table 1 and 2) |
|                          |     | (b) Report category boundaries when continuous variables were categorized                                                                                                                                    | 3-4                                                   |
|                          |     | (c) If relevant, consider translating estimates of relative risk into absolute risk for a meaningful time period                                                                                             | n/a                                                   |
| Other analyses           | 17  | Report other analyses done—eg analyses of subgroups and interactions, and sensitivity analyses                                                                                                               | 4                                                     |
| <b>Discussion</b>        |     |                                                                                                                                                                                                              |                                                       |
| Key results              | 18  | Summarise key results with reference to study objectives                                                                                                                                                     | 9                                                     |
| Limitations              | 19  | Discuss limitations of the study, taking into account sources of potential bias or imprecision. Discuss both direction and magnitude of any potential bias.                                                  | 9-11                                                  |
| Interpretation           | 20  | Give a cautious overall interpretation of results considering objectives, limitations, multiplicity of analyses, results from similar studies, and other relevant evidence                                   | 10-11                                                 |
| Generalisability         | 21  | Discuss the generalisability (external validity) of the study results                                                                                                                                        | 10-11                                                 |
| <b>Other information</b> |     |                                                                                                                                                                                                              |                                                       |
| Funding                  | 22  | Give the source of funding and the role of the funders for the present study and, if applicable, for the original study on which the present article is based                                                | 12                                                    |

\*Give information separately for cases and controls in case-control studies and, if applicable, for exposed and unexposed groups in cohort and cross-sectional studies.

**Note:** An Explanation and Elaboration article discusses each checklist item and gives methodological background and published examples of transparent reporting. The STROBE checklist is best used in conjunction with this article (freely available on the Web sites of PLoS Medicine at <http://www.plosmedicine.org/>, Annals of Internal Medicine at <http://www.annals.org/>, and Epidemiology at <http://www.epidem.com/>). Information on the STROBE Initiative is available at [www.strobe-statement.org](http://www.strobe-statement.org).
