# Supplementary material for: Cross-sectional associations between physical activity pattern, sports participation, screen time and mental health in Swedish adolescents
Source: PubMed Central journal article supplement — BMJ Open. 2022 Aug 2;12(8):e061929. doi: 10.1136/bmjopen-2022-061929 (PMC9351317; doi:10.1136/bmjopen-2022-061929), 2022-08-02
Supplement: bmjopen-2022-061929supp001.pdf [file bmjopen-2022-061929supp001.pdf]

## SUPPLEMENTAL MATERIAL

| <b>Supplemental material 1.</b> Crude and adjusted associations between predictors and anxiety (SCAS-S) and health-related quality of life (Kidsscreen-10) were analyzed with multi-level mixed linear regression models |                  |                                |                   |          |                                |                   |                                                |                                |                   |          |                                |                   |
|--------------------------------------------------------------------------------------------------------------------------------------------------------------------------------------------------------------------------|------------------|--------------------------------|-------------------|----------|--------------------------------|-------------------|------------------------------------------------|--------------------------------|-------------------|----------|--------------------------------|-------------------|
| Model                                                                                                                                                                                                                    | Anxiety (SCAS-S) |                                |                   |          |                                |                   | Health-related quality of life (Kidsscreen-10) |                                |                   |          |                                |                   |
|                                                                                                                                                                                                                          | Crude            |                                |                   | Adjusted |                                |                   | Crude                                          |                                |                   | Adjusted |                                |                   |
|                                                                                                                                                                                                                          | n                | Unstandardized B (95% CI)      | Standardized beta | n        | Unstandardized B (95% CI)      | Standardized beta | n                                              | Unstandardized B (95% CI)      | Standardized beta | n        | Unstandardized B (95% CI)      | Standardized beta |
| <b>1. MVPA</b>                                                                                                                                                                                                           |                  |                                |                   |          |                                |                   |                                                |                                |                   |          |                                |                   |
| 1.1 MVPA whole week                                                                                                                                                                                                      | 854              | <b>-0.058 (-0.091, -0.025)</b> | <b>-0.138</b>     | 831      | <b>-0.035 (-0.062, -0.007)</b> | <b>-0.082</b>     | 873                                            | <b>0.044 (0.028, 0.060)</b>    | <b>0.157</b>      | 848      | <b>0.036 (0.021, 0.051)</b>    | <b>0.130</b>      |
| 1.2 MVPA leisure time (weekdays)                                                                                                                                                                                         | 1000             | <b>-0.072 (-0.106, -0.038)</b> | -0.136            | 971      | <b>-0.062 (-0.089, -0.034)</b> | <b>-0.118</b>     | 1023                                           | <b>0.049 (0.029, 0.068)</b>    | <b>0.137</b>      | 991      | <b>0.043 (0.025, 0.061)</b>    | <b>0.122</b>      |
| 1.3 MVPA leisure time (weekend)                                                                                                                                                                                          | 866              | -0.017 (-0.038, 0.004)         | -0.053            | 843      | -0.011 (-0.030, 0.010)         | -0.033            | 886                                            | <b>0.030 (0.019, 0.041)</b>    | <b>0.144</b>      | 861      | <b>0.028 (0.017, 0.039)</b>    | <b>0.135</b>      |
| 1.4 MVPA school time                                                                                                                                                                                                     | 1000             | -0.095 (-0.147, -0.043)        | -0.135            | 971      | -0.006 (-0.047, 0.036)         | -0.008            | 1023                                           | <b>0.056 (0.022, 0.090)</b>    | <b>0.117</b>      | 991      | 0.019 (-0.013, 0.052)          | 0.052             |
| <b>2. SED</b>                                                                                                                                                                                                            |                  |                                |                   |          |                                |                   |                                                |                                |                   |          |                                |                   |
| 2.1 SED whole week                                                                                                                                                                                                       | 854              | <b>0.009 (0.002, 0.017)</b>    | 0.077             | 831      | 0.011 (-0.004, 0.026)          | 0.089             | 873                                            | <b>-0.009 (-0.016, -0.002)</b> | <b>-0.113</b>     | 848      | <b>-0.021 (-0.029, -0.012)</b> | <b>-0.261</b>     |
| 2.2 SED bouts (10 min) whole week                                                                                                                                                                                        | 854              | 0.008 (-0.001, 0.017)          | 0.064             | 831      | 0.000 (-0.010, 0.010)          | 0.001             | 873                                            | <b>-0.013 (-0.018, -0.007)</b> | <b>-0.155</b>     | 848      | <b>-0.011 (-0.016, -0.005)</b> | <b>-0.130</b>     |
| 2.3 SED leisure time (weekdays)                                                                                                                                                                                          | 1000             | <b>0.009 (0.004, 0.015)</b>    | <b>0.081</b>      | 971      | <b>0.026 (0.011, 0.041)</b>    | <b>0.228</b>      | 1023                                           | -0.005 (-0.009, 0.000)         | -0.063            | 991      | <b>-0.027 (-0.040, -0.015)</b> | <b>-0.358</b>     |
| 2.4 SED leisure time (weekend)                                                                                                                                                                                           | 866              | -0.003 (-0.009, 0.002)         | -0.036            | 843      | 0.004 (-0.007, 0.015)          | 0.042             | 886                                            | -0.004 (-0.008, 0.001)         | -0.056            | 861      | <b>-0.014 (-0.020, -0.008)</b> | <b>-0.230</b>     |
| 2.5 SED school                                                                                                                                                                                                           | 1000             | <b>0.024 (0.009, 0.039)</b>    | <b>0.112</b>      | 971      | -0.009 (-0.030, 0.011)         | -0.045            | 1023                                           | <b>-0.013 (-0.025, -0.001)</b> | <b>-0.091</b>     | 991      | -0.011 (-0.026, 0.004)         | -0.079            |
| <b>3. Organized sports</b>                                                                                                                                                                                               |                  |                                |                   |          |                                |                   |                                                |                                |                   |          |                                |                   |
| Did not participate                                                                                                                                                                                                      | 291              | ref                            |                   | 209      | ref                            |                   | 296                                            | ref                            |                   | 213      | ref                            |                   |
| Participated                                                                                                                                                                                                             | 750              | <b>-1.589 (-2.743, -0.435)</b> |                   | 604      | -0.963 (-2.07, 0.141)          |                   | 766                                            | <b>0.855 (0.036, 1.674)</b>    |                   | 617      | 0.407 (-0.554, 1.367)          |                   |
| <b>4. Screen time weekday</b>                                                                                                                                                                                            |                  |                                |                   |          |                                |                   |                                                |                                |                   |          |                                |                   |
| ≤2 hours                                                                                                                                                                                                                 | 343              | ref                            |                   | 329      | ref                            |                   | 348                                            | ref                            |                   | 333      | ref                            |                   |
| 3-4 hours                                                                                                                                                                                                                | 492              | 0.388 (-0.599, 1.375)          |                   | 483      | 0.407 (-0.481, 1.295)          |                   | 503                                            | <b>-0.827 (-1.529, -0.124)</b> |                   | 493      | <b>-1.007 (-1.591, -0.423)</b> |                   |
| ≥5 hours                                                                                                                                                                                                                 | 235              | <b>2.626 (1.135, 4.117)</b>    |                   | 226      | <b>2.409 (1.083, 3.735)</b>    |                   | 242                                            | <b>-2.521 (-1.529, -0.125)</b> |                   | 232      | <b>-2.633 (-3.381, -1.885)</b> |                   |
| <b>5. Screen time weekend</b>                                                                                                                                                                                            |                  |                                |                   |          |                                |                   |                                                |                                |                   |          |                                |                   |
| ≤2 hours                                                                                                                                                                                                                 | 169              | ref                            |                   | 159      | ref                            |                   | 174                                            | ref                            |                   | 164      | ref                            |                   |
| 3-4 hours                                                                                                                                                                                                                | 392              | <b>1.302 (0.132, 2.471)</b>    |                   | 383      | 0.461 (-0.609, 1.531)          |                   | 402                                            | -0.594 (-1.474, 0.286)         |                   | 391      | -0.261 (-1.078, 0.555)         |                   |
| ≥5 hours                                                                                                                                                                                                                 | 507              | <b>2.368 (1.236, 3.501)</b>    |                   | 495      | <b>1.896 (0.881, 2.912)</b>    |                   | 515                                            | <b>-1.607 (-2.582, -0.633)</b> |                   | 502      | <b>-1.485 (-2.385, -0.585)</b> |                   |

B unstandardized coefficients, beta standardized coefficients, CI confidence interval

MVPA Moderate-to-vigorous physical activity, SED sedentary time, SCAS-S Short version of the Spence Children's Anxiety Scale

The adjusted models have been controlled for gender and parental education. Further, Model 3 were adjusted for time spent in MVPA, and Models 1-3 were adjusted for accelerometer wear-time

| <b>Supplemental material 2.</b> Crude associations between predictors and anxiety (SCAS-S) and health-related quality of life (Kidsscreen-10) were analyzed with multi-level mixed linear regression models stratified by gender |                  |                                                |
|----------------------------------------------------------------------------------------------------------------------------------------------------------------------------------------------------------------------------------|------------------|------------------------------------------------|
| Model                                                                                                                                                                                                                            | Anxiety (SCAS-S) | Health-related quality of life (Kidsscreen-10) |

|                                   | Girls |                                |                   | Boys |                                |                   | Girls      |                                 |                   | Boys |                                 |                   |
|-----------------------------------|-------|--------------------------------|-------------------|------|--------------------------------|-------------------|------------|---------------------------------|-------------------|------|---------------------------------|-------------------|
|                                   | n     | Unstandardized B (95% CI)      | Standardized beta | n    | Unstandardized B (95% CI)      | Standardized beta | n          | Unstandardized B (95% CI)       | Standardized beta | n    | Unstandardized B (95% CI)       | Standardized beta |
| <b>1. MVPA</b>                    |       |                                |                   |      |                                |                   |            |                                 |                   |      |                                 |                   |
| 1.1 MVPA whole week               | 461   | <b>-0.043 (-0.079, -0.007)</b> | <b>-0.095</b>     | 393  | <b>-0.026 (-0.060, 0.008)</b>  | <b>-0.078</b>     | 473        | <b>0.027 (0.004, 0.05)</b>      | <b>0.093</b>      | 400  | <b>0.044 (0.020, 0.069)</b>     | <b>0.171</b>      |
| 1.2 MVPA leisure time (weekdays)  | 517   | <b>-0.096 (-0.139, -0.055)</b> | <b>-0.169</b>     | 483  | <b>-0.037 (-0.067, -0.007)</b> | <b>-0.090</b>     | 531        | <b>0.049 (0.023, 0.07)</b>      | <b>0.132</b>      | 492  | <b>0.042 (0.018, 0.067)</b>     | <b>0.130</b>      |
| 1.3 MVPA leisure time (weekend)   | 468   | -0.021 (-0.049, 0.006)         | -0.063            | 398  | -0.003 (-0.025, 0.019)         | -0.011            | 480        | 0.021 (-0.001, 0.043)           | 0.095             | 406  | <b>0.036 (0.021, 0.050)</b>     | <b>0.189</b>      |
| 1.4 MVPA school time              | 517   | -0.012 (-0.080, 0.056)         | -0.015            | 483  | 0.004 (-0.047, 0.054)          | 0.007             | 531        | 0.003 (-0.042, 0.048)           | 0.005             | 492  | 0.028 (-0.009, 0.066)           | 0.0637            |
| <b>2. SED</b>                     |       |                                |                   |      |                                |                   |            |                                 |                   |      |                                 |                   |
| 2.1 SED whole week                | 461   | 0.000 (-0.008, 0.010)          | 0.004             | 393  | 0.006 (-0.002, 0.014)          | 0.063             | 473        | -0.004 (-0.012, 0.003)          | -0.057            | 400  | -0.009 (-0.018, 0.000)          | -0.119            |
| 2.2 SED bouts (10 min) whole week | 461   | -0.002 (-0.014, 0.009)         | -0.017            | 393  | 0.003 (-0.008, 0.014)          | 0.028             | <b>473</b> | <b>-0.010 (-0.016, -0.003)</b>  | <b>-0.122</b>     | 400  | <b>-0.0100 (-0.018, -0.002)</b> | -0.120            |
| 2.3 SED leisure time (weekdays)   | 517   | 0.001 (-0.007, 0.010)          | 0.010             | 483  | 0.008 (0.001, 0.014)           | 0.087             | 531        | -0.003 (-0.009, -0.004)         | <b>-0.033</b>     | 492  | -0.004 (-0.010, 0.003)          | -0.052            |
| 2.4 SED leisure time (weekend)    | 468   | -0.003 (-0.011, 0.004)         | -0.033            | 398  | -0.000 (-0.008, 0.008)         | -0.002            | 480        | 0.004 (-0.005, 0.006)           | 0.006             | 406  | <b>-0.009 (-0.014, -0.004)</b>  | <b>-0.155</b>     |
| 2.5 SED school                    | 517   | 0.009 (-0.007, 0.025)          | 0.042             | 483  | -0.010 (-0.027, 0.006)         | -0.056            | 531        | 0.000 (-0.016, 0.016)           | -0.000            | 492  | -0.005 (-0.020, 0.010)          | -0.034            |
| <b>3. Organized sports</b>        |       |                                |                   |      |                                |                   |            |                                 |                   |      |                                 |                   |
| Did not participate               | 152   | ref                            |                   | 139  | ref                            |                   | 155        | ref                             |                   | 141  | ref                             |                   |
| Participated                      | 376   | -0.914 (-2.528, 0.700)         |                   | 374  | <b>-2.009 (-3.445, -0.572)</b> |                   | 386        | 0.132 (-1.110, 1.375)           |                   | 380  | 1.358 (0.133, 2.58)             |                   |
| <b>4. Screen time weekday</b>     |       |                                |                   |      |                                |                   |            |                                 |                   |      |                                 |                   |
| ≤2 hours                          | 168   | ref                            |                   | 175  | ref                            |                   | 173        | ref                             |                   | 175  | ref                             |                   |
| 3-4 hours                         | 257   | 0.550 (-0.984, 2.084)          |                   | 235  | 0.014 (-1.135, 1.162)          |                   | 261        | <b>-1.095 (-19.976, -0.213)</b> |                   | 242  | -0.587 (-1.546, 0.372)          |                   |
| ≥5 hours                          | 120   | <b>3.856 (1.916, 5.796)</b>    |                   | 115  | 1.190 (-0.143, 2.523)          |                   | 126        | <b>-3.190 (-4.292, -2.089)</b>  |                   | 116  | <b>-1.609 (-2.845, -0.372)</b>  |                   |
| <b>5. Screen time weekend</b>     |       |                                |                   |      |                                |                   |            |                                 |                   |      |                                 |                   |
| ≤2 hours                          | 546   | ref                            |                   | 104  | ref                            |                   | 69         | ref                             |                   | 105  | ref                             |                   |
| 3-4 hours                         | 65    | 1.126 (-1.097, 3.350)          |                   | 168  | -0.163 (-1.719, 1.393)         |                   | 232        | -0.903 (-2.388, 0.582)          |                   | 170  | 0.0449 (-1.504, 1.594)          |                   |
| ≥5 hours                          | 257   | <b>2.931 (0.924, 4.938)</b>    |                   | 250  | 0.992 (-0.222, 2.206)          |                   | 260        | <b>-2.530 (-4.036, -1.025)</b>  |                   | 255  | -0.615 (-2.100, 0.870)          |                   |

B unstandardized coefficients, beta standardized coefficients, CI confidence interval

MVPA Moderate-to-vigorous physical activity, SED sedentary time, SCAS-S Short version of the Spence Children's Anxiety Scale

**Supplemental material 3.** Unadjusted mean SCAS-S and Kidsscreen-10 score and SD for students in the highest and lowest groups of MVPA and screen time

|                          | Anxiety (SCAS-S) |            |      |            | Health-related quality of life (Kidsscreen-10) |            |      |            |
|--------------------------|------------------|------------|------|------------|------------------------------------------------|------------|------|------------|
|                          | Girls            |            | Boys |            | Girls                                          |            | Boys |            |
|                          | n                | mean ± SD  | n    | mean ± SD  | n                                              | mean ± SD  | n    | mean ± SD  |
| <b>Screen time</b>       |                  |            |      |            |                                                |            |      |            |
| <b>Weekday</b>           |                  |            |      |            |                                                |            |      |            |
| ≤2 hours                 | 168              | 15.46±8.37 | 175  | 10.29±6.60 | 173                                            | 39.62±5.29 | 175  | 41.70±5.22 |
| ≥5 hours                 | 120              | 19.33±8.24 | 115  | 11.56±7.25 | 126                                            | 36.40±5.60 | 116  | 39.78±5.78 |
| <b>Weekend</b>           |                  |            |      |            |                                                |            |      |            |
| ≤2 hours                 | 65               | 14.71±7.19 | 104  | 10.04±6.73 | 69                                             | 39.96±5.34 | 105  | 41.34±5.77 |
| ≥5 hours                 | 257              | 17.69±8.43 | 250  | 11.21±6.84 | 260                                            | 37.35±5.19 | 255  | 40.59±5.44 |
| <b>Physical activity</b> |                  |            |      |            |                                                |            |      |            |
| MVPA lowest tertile      | 157              | 17.07±8.77 | 128  | 12.06±7.48 | 160                                            | 37.83±5.25 | 135  | 39.65±5.94 |
| MVPA highest tertile     | 152              | 15.65±6.98 | 130  | 9.89±6.32  | 157                                            | 39.20±4.58 | 130  | 42.32±4.47 |
| <b>Organized sports</b>  |                  |            |      |            |                                                |            |      |            |
| Participated             | 376              | 16.31±7.67 | 374  | 10.02±6.28 | 386                                            | 38.41±5.01 | 380  | 41.41±4.90 |
| Did not participate      | 152              | 17.28±8.61 | 139  | 12.06±7.01 | 155                                            | 38.35±5.59 | 141  | 39.97±5.77 |

MVPA moderate-to-vigorous-physical activity, SED sedentary time, SCAS-S Short version of the Spence Children's Anxiety Scale
